1 **FMO rewires metabolism to promote longevity through**  
2 **tryptophan and one carbon metabolism**  
3  
4  
5  
6  
7

8 **Authors:**

9 Hyo Sub Choi<sup>1\*</sup>, Ajay Bhat<sup>1\*</sup>, Marshall B. Howington<sup>2\*</sup>, Megan L. Schaller<sup>1</sup>, Rebecca Cox<sup>1</sup>, Shijiao  
10 Huang<sup>1</sup>, Safa Beydoun<sup>1</sup>, Hillary A. Miller<sup>2</sup>, Angela M. Tuckowski<sup>2</sup>, Joy Mecano<sup>1</sup>, Elizabeth S. Dean<sup>1</sup>,  
11 Lindy Jensen<sup>1</sup>, Daniel A. Beard<sup>1</sup>, Charles R. Evans<sup>3</sup>, Scott F. Leiser<sup>1,3</sup>

12 \* Denotes equal contributions  
13  
14  
15  
16

17 **Affiliations:**

- 18 1. Department of Molecular and Integrative Physiology, University of Michigan, Ann Arbor, MI 48109,  
19 USA.  
20 2. Cellular and Molecular Biology Program, University of Michigan, Ann Arbor, MI 48109, USA.  
21 3. Department of Internal Medicine, University of Michigan, Ann Arbor, MI 48109, USA.  
22  
23

24 **Keywords:**

25 aging, metabolism, flavin containing monooxygenase, one carbon metabolism, tryptophan,  
26 kynurenine, stress resistance, lifespan

27 **Abstract**

28 Flavin containing monooxygenases (FMOs) are promiscuous enzymes known for metabolizing  
29 a wide range of exogenous compounds. In *C. elegans*, *fmo-2* expression increases lifespan and  
30 healthspan downstream of multiple longevity-promoting pathways through an unknown  
31 mechanism. Here, we report that, contrary to its classification as a xenobiotic enzyme, *fmo-2*  
32 expression leads to rewiring of endogenous metabolism principally through changes in one  
33 carbon metabolism (OCM). Using computer modeling, we identify decreased methylation as the  
34 major OCM flux modified by FMO-2 that is sufficient to recapitulate its longevity benefits. We  
35 further find that tryptophan is decreased in multiple mammalian FMO overexpression models  
36 and is a validated substrate for FMO enzymes. Our resulting model connects a single enzyme  
37 to two previously unconnected key metabolic pathways and provides a framework for the  
38 metabolic interconnectivity of longevity-promoting pathways such as dietary restriction. FMOs  
39 are well-conserved enzymes that are also induced by lifespan-extending interventions in mice,  
40 supporting a conserved and critical role in promoting health and longevity through metabolic  
41 remodeling.

42

## 43 **Introduction**

44 Flavin-containing monooxygenases (FMOs) are a family of enzymes that oxygenate  
45 substrates with nucleophilic centers, such as nitrogen and sulfur<sup>1</sup>. They were first discovered 50  
46 years ago and have been studied extensively under the context of xenobiotic and drug  
47 metabolism<sup>1</sup>. FMOs bind to an FAD prosthetic group and interact with an NADPH cofactor to  
48 oxygenate substrates<sup>2</sup>. The FMO protein family is highly conserved both genetically and  
49 structurally from bacteria to humans<sup>2,3</sup>. Considering the conserved nature of FMOs, it is  
50 plausible that they share an endogenous, more ancient physiological role than detoxifying  
51 xenobiotics.

52 Through a screen of genes downstream the hypoxia-inducible factor-1 (HIF-1), a  
53 longevity-promoting transcription factor in *C. elegans*, flavin-containing monooxygenase-2 (*fmo-*  
54 2) was identified as necessary for the longevity and health benefits of both hypoxia and dietary  
55 restriction (DR)<sup>4</sup>. The *fmo-2* gene is also sufficient to confer these benefits on its own when  
56 overexpressed<sup>4</sup>. Recently, studies also suggest potential endogenous role(s) for mammalian  
57 FMOs, where changes in expression of multiple FMO proteins affect systemic metabolism<sup>5-10</sup>.  
58 Initial correlative reports also link FMOs to the aging process, showing that *Fmo* genes are  
59 frequently induced in long-lived mouse models, such as DR mice<sup>5,6</sup>. However, the  
60 mechanism(s) for how *Fmos* modulate endogenous metabolism and/or aging *in vivo* is unclear,  
61 as is their potential to benefit health and longevity in multiple species.

62 While frequently implicated in cancer cells, recent studies identify one carbon  
63 metabolism (OCM) as a common downstream target of multiple longevity pathways<sup>11-14</sup>. OCM is  
64 an important intermediate metabolic pathway and refers to a two-cycle metabolic network  
65 including the folate cycle and the methionine cycle<sup>15</sup>. OCM takes nutrient inputs, including  
66 glucose and vitamin B12, and utilizes them to synthesize intermediates for metabolic processes  
67 involved in growth and survival, including nucleotide metabolism, the transsulfuration and  
68 transmethylation pathways, and lipid metabolism<sup>12,13,16</sup>. In particular, suppressing expression of

69 the methionine cycle gene *sams-1* by RNA-mediated interference (RNAi) extends the wild type  
70 worm lifespan, but fails to further extend the lifespan of the genetic DR model *eat-2* mutants<sup>17</sup>.

71 Kynurenine synthesis from tryptophan and subsequent metabolism is another important  
72 metabolic pathway that can play a role in many processes, including longevity regulation.

73 Knocking out tryptophan 2,3-dioxygenase (TDO), which catalyzes the first and rate-limiting step  
74 of this pathway, leads to lifespan extension in worms and flies<sup>18,19</sup>. Similarly, suppressing the

75 kynurenine pathway by knocking down kynureninase (*kynu-1*) in worms also increases  
76 lifespan<sup>20</sup>. The kynurenine pathway competes for tryptophan with the serotonergic biosynthesis

77 pathway and produces nicotinamide adenine dinucleotide (NAD) and other metabolites,  
78 including kynurenic acid and picolinic acid<sup>21</sup>.

79 Given that 1) induction of Fmos correlates with increased longevity across species, 2)

80 nematode *fmo-2* is necessary and sufficient to improve health and longevity downstream of

81 metabolic perturbations, and 3) loss of Fmo expression can modify aspects of metabolism, we

82 hypothesized that Fmos affect aging by modifying one or more distinct metabolic processes.

83 Therefore, we sought to determine the metabolic changes that occur when the expression of

84 nematode *fmo-2* is perturbed to identify its mechanism of longevity regulation. Our resulting

85 data support a model where *fmo-2* oxygenates tryptophan, leading to alteration of OCM

86 components that confer longevity and healthspan benefits by reducing flux through methylation

87 processes.

## 88 **Results**

89

### 90 ***Fmo-2* alters one carbon metabolism**

91           Based on the conserved enzymatic mechanism<sup>2,3</sup> and our published data supporting a  
92 key role for nematode FMO-2 in regulating stress resistance, healthspan and longevity<sup>4</sup>, we  
93 hypothesized that FMO-2 may significantly alter endogenous metabolism in *C. elegans*. To test  
94 if systemic metabolism was broadly altered by FMO-2, we used untargeted metabolomics  
95 analysis (**Supplementary Data 1**) of three strains with varying *fmo-2* expression: the wild type  
96 reference strain (N2 Bristol) the *fmo-2(ok2147)* putative knockout strain (FMO-2 KO), and our  
97 previously published long-lived *fmo-2* overexpression (KAE9) strain (FMO-2 OE). The resulting  
98 principal component analysis (PCA) shows a substantial explained variance (65.3%) through  
99 principal components (PC) 1 and 2 (**Figure 1A**). Our untargeted metabolomics data suggest a  
100 distinct difference in the metabolome between the three strains, consistent with expression of  
101 nematode *fmo-2* being sufficient to modify endogenous metabolism (**Figure 1B**).

102           Having established broadly that *fmo-2* expression modifies metabolism, we next asked  
103 what key metabolic aspects are modified. Using p-value < 0.05 as our significance threshold,  
104 we identified five metabolic pathways that are significantly altered by the overexpression of *fmo-*  
105 2, most of which are involved in amino acid metabolism (**Figure 1C, Supplementary Data 2**).  
106 Of the five pathways, we observed the most significant enrichment in glycine, serine, and  
107 threonine metabolism (**Figure 1C**). Exogenous supplementation of glycine in worm diet is  
108 reported to extend lifespan by remodeling the methionine cycle<sup>22</sup>, a component of one carbon  
109 metabolism (OCM) and another significantly enriched metabolic pathway from our analysis,  
110 cysteine and methionine metabolism (**Figure 1C, Supplementary Data 2**). Indeed, OCM is a  
111 nexus of multiple metabolic pathways that are necessary for survival; OCM is implicated in  
112 multiple longevity pathways, including dietary restriction, insulin/IGF-1 signaling, and the  
113 metformin-induced longevity response<sup>13,16,23</sup>. Due to its relevance in multiple longevity pathways

114 and the direct involvement of cysteine and methionine metabolism within this metabolic network,  
115 we postulated that *fmo-2* regulates longevity through its interactions with OCM.

116 To test whether *fmo-2* expression modifies OCM, we used targeted metabolomics  
117 analysis on a panel of metabolites involved in OCM and related pathways to determine whether  
118 their abundance levels were altered following *fmo-2* expression (**Supplementary Data 3**). We  
119 hypothesized that the affected metabolites would have abundance levels that correlate with  
120 *fmo-2* expression level. Thus, we compared the level of metabolite abundance between the wild  
121 type and FMO-2 OE and also between the wild type and FMO-2 KO. Consistent with our  
122 hypothesis that OCM is altered by *fmo-2* expression, we observed significant changes in the  
123 abundance level of cystine, homocysteine, s-adenosylmethionine (SAM), and thiamine in FMO-  
124 2 OE compared to the wild type (**Figure 1D**). With the exception of cystine, we observed  
125 insignificant but consistent trends in the abundance level of these metabolites that moved in the  
126 opposite direction in FMO-2 KO compared to FMO-2 OE (**Figure 1D**). The insignificant trends in  
127 FMO-2 KO are consistent with our previous observation that knocking out *fmo-2* does not affect  
128 worm lifespan<sup>4</sup>. Similarly, we also observed insignificant but consistent trends in the abundance  
129 level that correlate with *fmo-2* expression level in multiple other metabolites that we measured  
130 (**Supplementary Figure 1**). Taken together, our results are consistent with the hypothesis that  
131 the OCM pathway is modified by *fmo-2* expression.

132

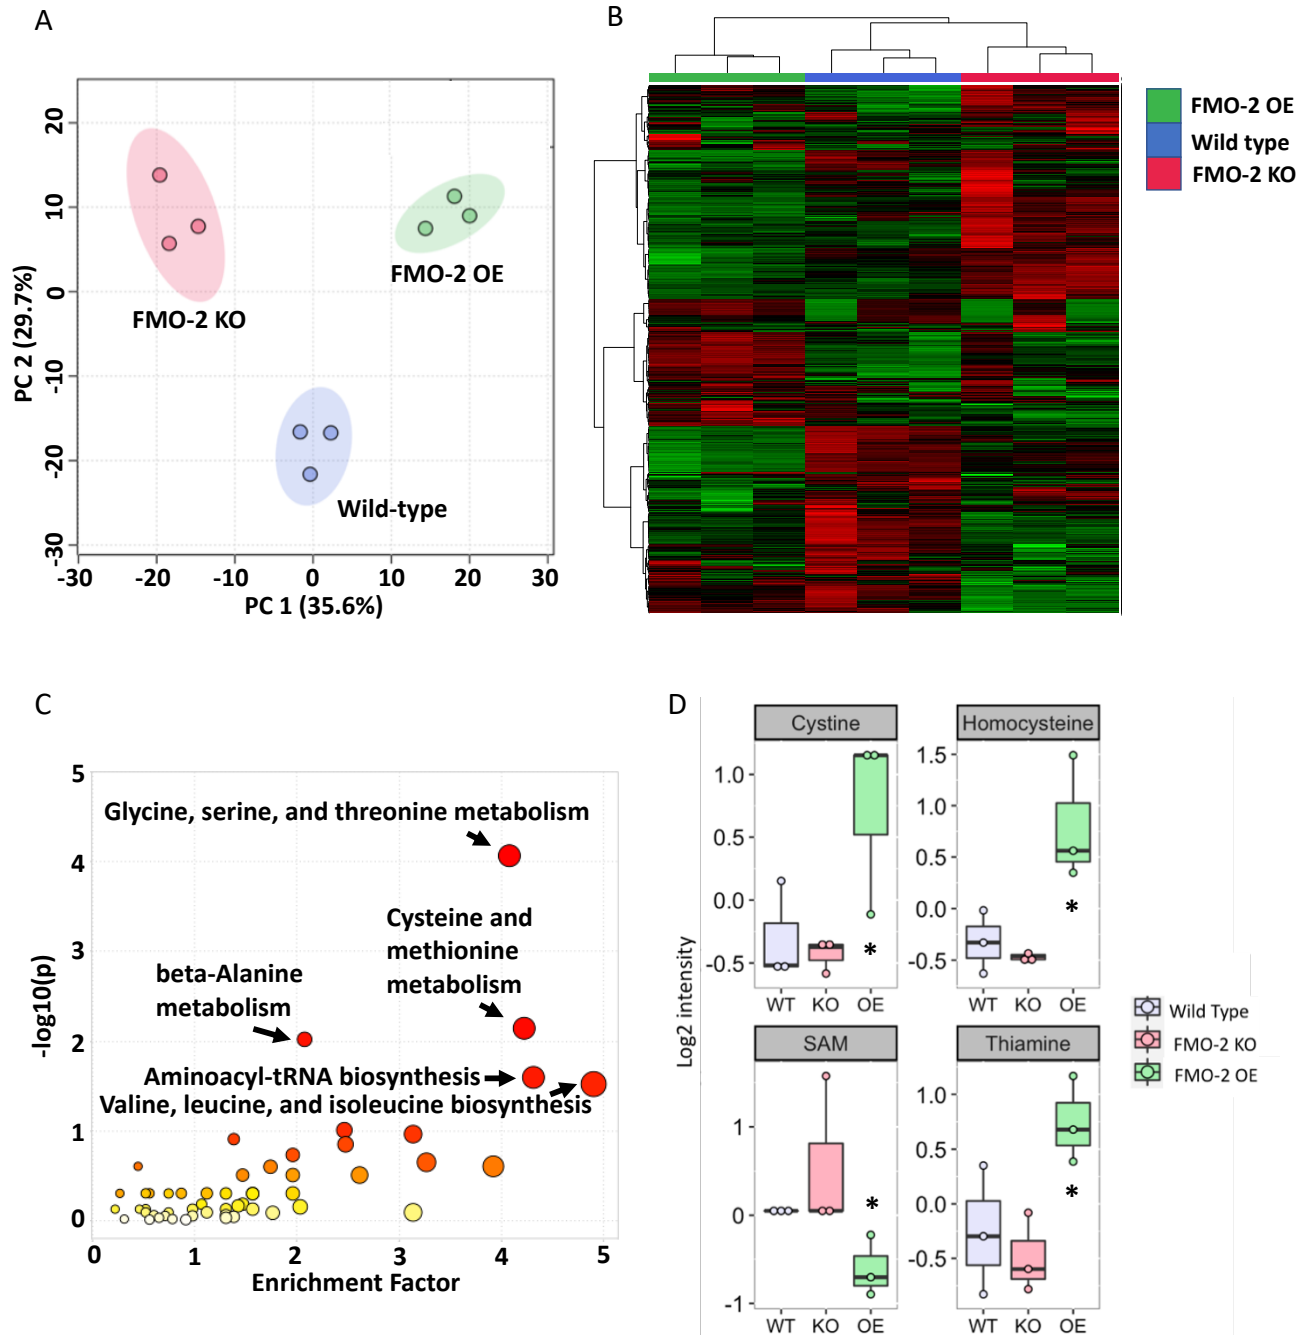

**Figure 1: One carbon metabolism is altered by *fmo-2* expression level.** A) Principal component analysis of untargeted LC-MS metabolomics data of wild type, FMO-2 OE, and FMO-2 KO strains of *C. elegans*. B) Heatmap of untargeted LC-MS metabolomics data of the wild type, FMO-2 OE and FMO-2 KO. C) Pathway enrichment analysis using untargeted LC-MS metabolomics data of wild type and FMO-2 OE. D) Comparison of targeted metabolomics data of metabolites related to OCM between the wild type, FMO-2 OE and FMO-2 KO normalized to the median and log transformed. SAM = s-adenosylmethionine. \* represents  $p < 0.05$  using paired t-test.

133  
134

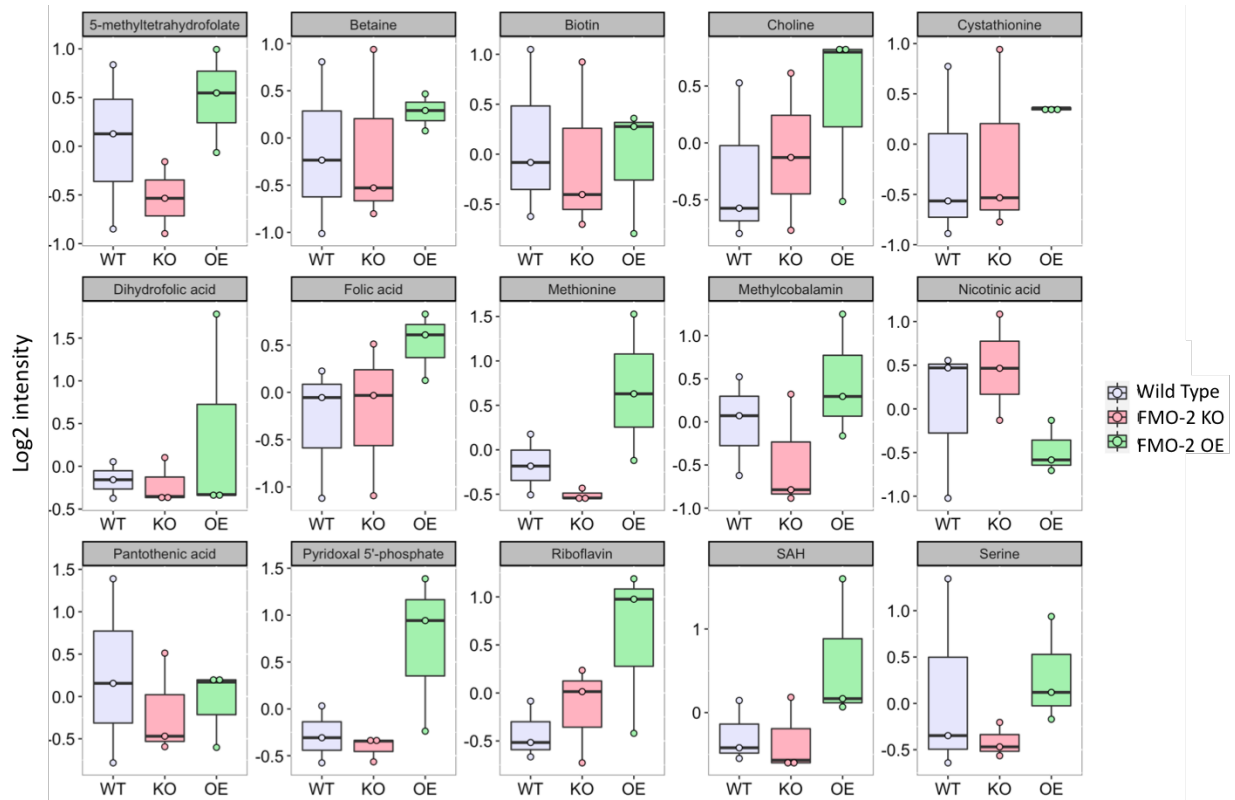

135  
136

**Supplementary Figure 1: Comparison of targeted metabolomics data of metabolites related to OCM between the wild-type, FMO-2 OE and FMO-2 KO. SAH = s-adenosylhomocysteine. Data are median normalized and log transformed.**



137 One carbon metabolism interacts with *fmo-2* to regulate stress resistance and longevity

138 Having established that FMO-2 modifies endogenous metabolism broadly and OCM  
139 specifically, we next hypothesized that these metabolic changes are causal for longevity  
140 phenotypes. Previous studies identify increased stress resistance as a common phenotype  
141 shared by multiple long-lived organisms both within and between species<sup>24-27</sup>. To determine the  
142 functional interaction between *fmo-2* and OCM, we used RNAi to knockdown the expression of  
143 genes involved in OCM (**Figure 2A**) and tested for their role in promoting or repressing survival  
144 against the oxidative stressor paraquat. Individual knockdown of multiple genes exhibit altered  
145 paraquat stress resistance phenotypes for the wild type and FMO-2 OE. Of the eight genes that  
146 we tested, the knockdown of five genes, *alh-3*, *atic-1*, *cbs-1*, *cth-2*, and *sams-1*, abrogate FMO-  
147 2 OE resistance against paraquat (**Figure 2B-F**), as assessed using log-rank test with a cutoff  
148 threshold of  $p < 0.0001$ <sup>28</sup> compared to the empty vector (EV) controls. Our data for the  
149 knockdowns of *alh-3*, *atic-1*, and *cbs-1* are consistent with previous reports that their expression  
150 levels are upregulated in long-lived worms<sup>11,29</sup>. *alh-3* is upregulated in *eat-2* mutants, *atic-1* is  
151 upregulated in both *eat-2* and *daf-2* mutants, and *cbs-1* is upregulated under cold-induced  
152 longevity and is required for the lifespan extension of *eat-2* and *glp-1* mutants<sup>11,29-31</sup>. *cth-2* is a  
153 homolog of the transsulfuration pathway enzyme cystathionine  $\gamma$ -lyase that is detrimental to the  
154 wild type lifespan when its expression is suppressed using RNAi<sup>30</sup>. Thus, it is plausible that  
155 these genes are required for multiple longevity pathways, including *fmo-2*-mediated longevity, to  
156 confer resistance against paraquat. Interestingly, while *sams-1* knockdown extends worm  
157 lifespan<sup>17</sup>, we find that knocking down *sams-1* abrogates FMO-2 OE paraquat resistance  
158 (**Figure 2F**), suggesting that the regulation of lifespan and stress resistance are uncoupled in  
159 this instance. This result is similar to previous work showing that *sams-1* knockdown is  
160 detrimental to survival under pathogen exposure<sup>32</sup>.

161 We also find that knocking down *mel-32* increases stress resistance of both the wild type  
162 and FMO-2 OE (**Figure 2G**), suggesting that the stress resistance conferred by the suppression

163 of *mel-32* is independent of *fmo-2*. The two remaining genes that we knocked down, *mtrr-1* and  
164 Y106G6E.4, did not affect the stress resistance of the worms (**Supplementary Figure 2**).  
165 Overall, our data show that five out of eight of the genes that we tested are required by FMO-2  
166 OE to confer paraquat resistance. These results are consistent with the hypothesis that OCM is  
167 a regulator of stress resistance and that there is a genetic interaction between *fmo-2* and OCM  
168 in that regulation.

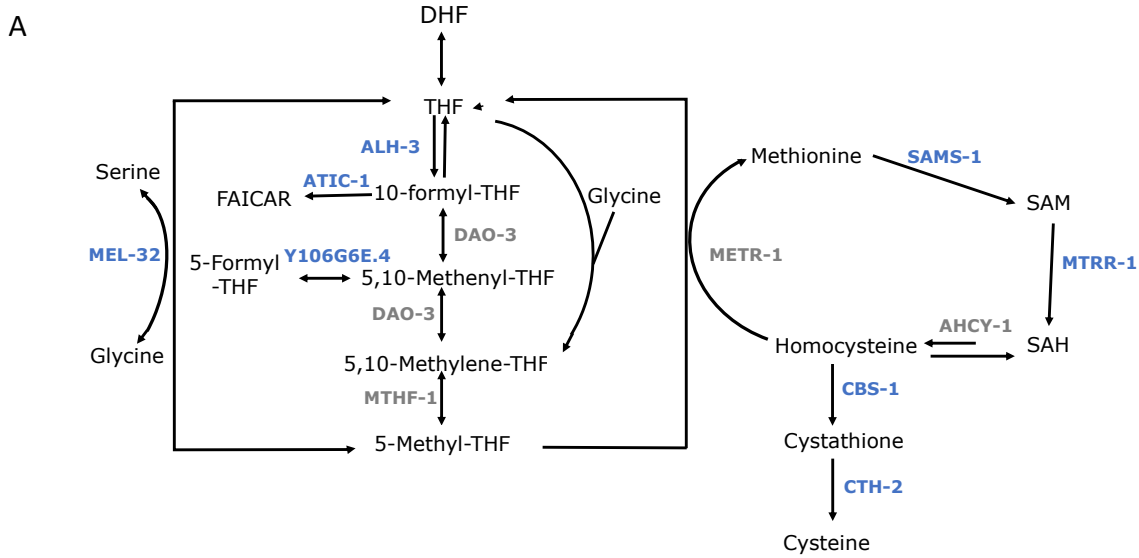

169  
170

171  
172  
173

●—● WT EV Control                      ●●● WT RNAi  
 ●—● FMO-2 OE EV Control            ●◆◆ FMO-2 OE RNAi

**B**

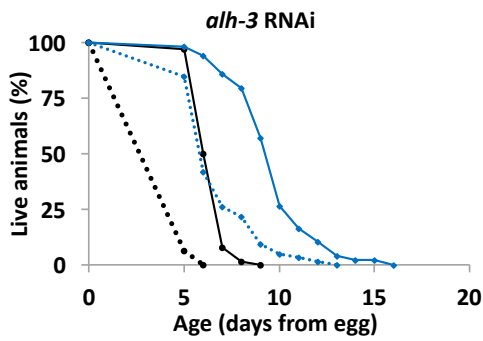

**C**

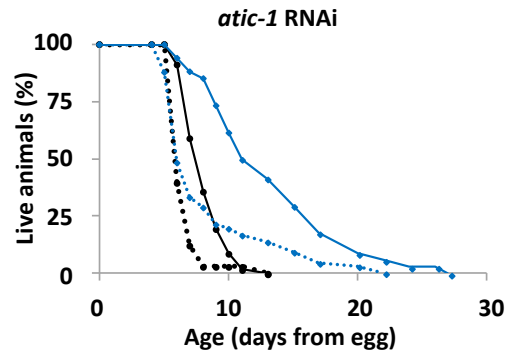

**D**

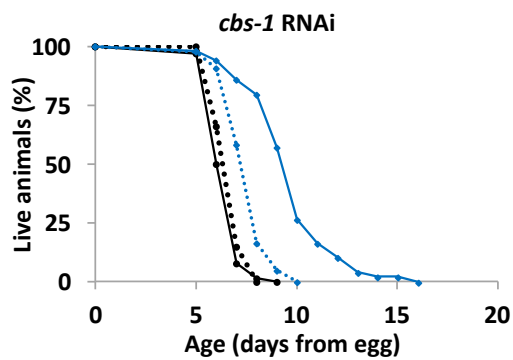

**E**

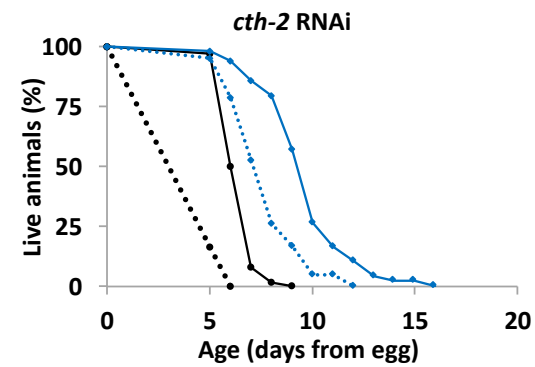

174  
175  
176  
177  
178

179

F

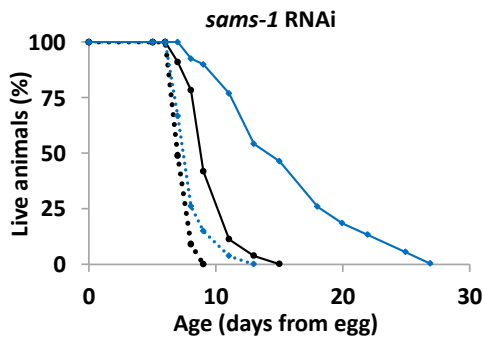

G

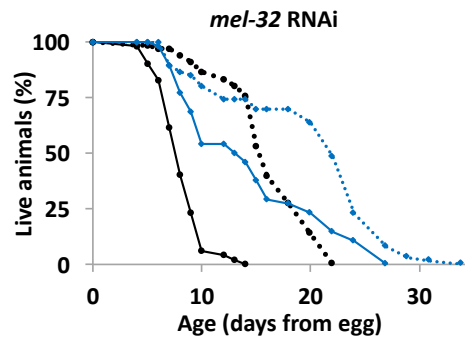

180  
181  
182  
183

**Figure 2: *Fmo-2* interacts with OCM genes to regulate resistance against paraquat.** A) Diagram of OCM network. Genes included in the screen are labeled in blue and genes not included in the screen are labeled in gray. B-G) 5 mM paraquat stress resistance assay (from L4) comparing the wild-type and FMO-2 OE on empty-vector (EV) and B) *alh-3* RNAi, C) *atic-1* RNAi, D) *cbs-1* RNAi, E) *cth-2* RNAi, F) *sams-1* RNAi, and G) *mel-32* RNAi. Statistics in Supplementary Data 4.

184

185

A

B

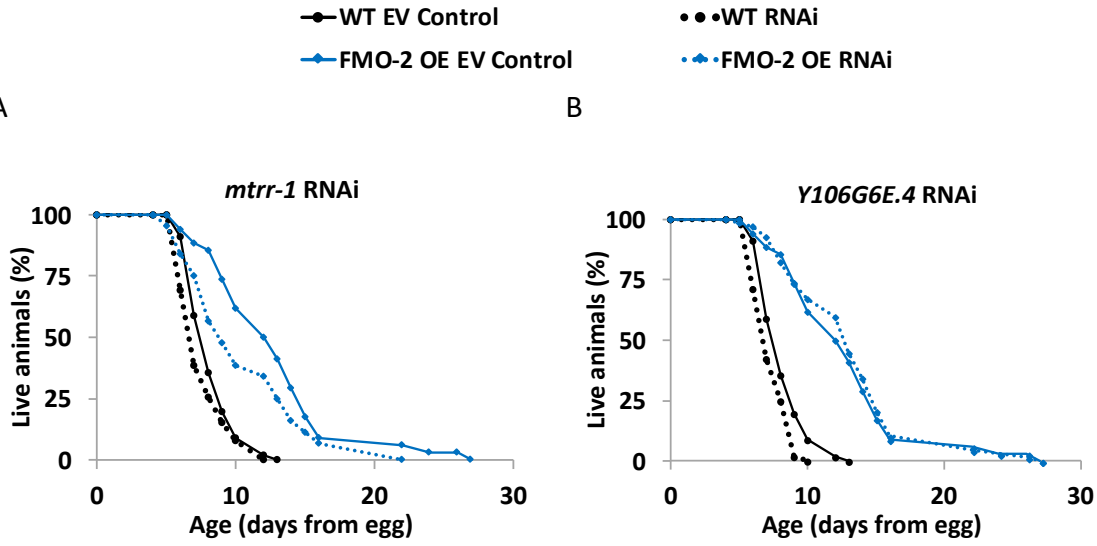

186

**Supplementary Figure 2: OCM genes that do not alter worm stress resistance.** 5 mM paraquat stress resistance assay comparing the wild-type and FMO-2 OE on empty-vector (EV) and A) *mtrr-1* RNAi and B) *Y106G6E.4* RNAi. Statistics in Supplementary Data 4.

187

188 To test the interaction between *fmo-2* and OCM more directly, we measured the  
189 longevity of worms with RNAi knockdown of genes from our paraquat resistance screen. We  
190 included FMO-2 KO in the lifespan analysis to determine if the interactions that we identify are  
191 dependent on *fmo-2* expression. Similar to the paraquat survival assays, multiple gene  
192 knockdowns showed altered lifespan phenotypes for the wild type, FMO-2 OE, and FMO-2 KO.  
193 Of the eight genes we tested, knockdown of two genes, *alh-3* and *cth-2*, suppress the lifespan  
194 extension of FMO-2 OE to the level of the wild type (**Figure 3A, B**), as assessed using log-rank  
195 test with a cutoff threshold of  $p < 0.0001^{28}$  compared to the empty vector (EV) controls,  
196 consistent with our paraquat survival data. In contrast, knockdown of *sams-1* increases the  
197 lifespan of the wild type and FMO-2 KO to the level of FMO-2 OE without further extending the  
198 lifespan of FMO-2 OE (**Figure 3C**), suggesting a separation between lifespan and stress  
199 resistance. Additionally, we find that knocking down *mel-32* only extends the lifespan of FMO-2  
200 OE (**Figure 3D**). It is possible that the metabolic alterations caused by increased *fmo-2*  
201 expression are required for *mel-32* gene suppression to promote worm lifespan.

202 Knocking down the remaining four genes, *atic-1*, *cbs-1*, *mtrr-1*, and Y106G6E.4, do not  
203 affect the lifespan of any of the worm strains (**Supplementary Figure 3**). Although knocking  
204 down *atic-1* and *cbs-1* abrogated FMO-2 OE paraquat resistance (**Figure 2C, D**), they did not  
205 abrogate FMO-2 OE lifespan (**Supplementary Figure 3A, B**). Similar to *sams-1* knockdown  
206 data, this finding suggests uncoupling of stress resistance and lifespan. In total, our data show  
207 that two of the genes that we tested are required for FMO-2 OE lifespan extension, another  
208 gene extends lifespan non-additively with FMO-2 OE, placing it in the same functional pathway,  
209 and one of the genes only extends the lifespan of FMO-2 OE when knocked down. Thus, our  
210 data support an interaction between *fmo-2* and genes involved with OCM in regulating worm  
211 lifespan.

212

213

A

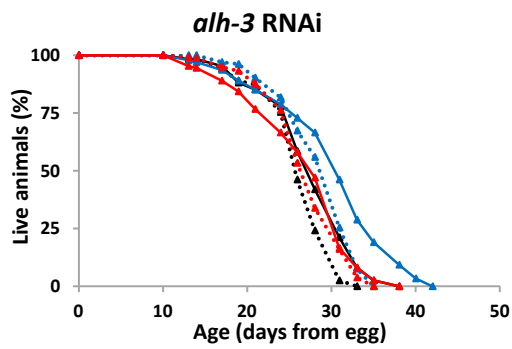

214

215

C

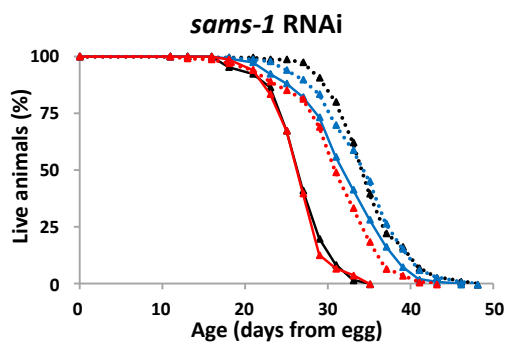

216

217

B

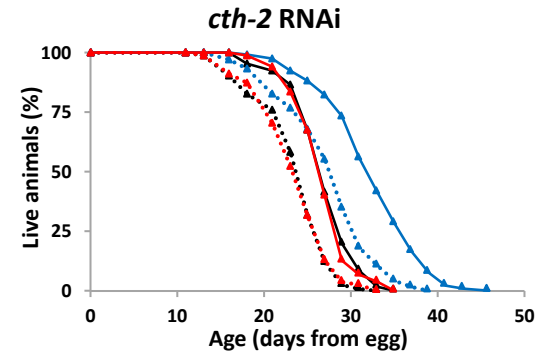

D

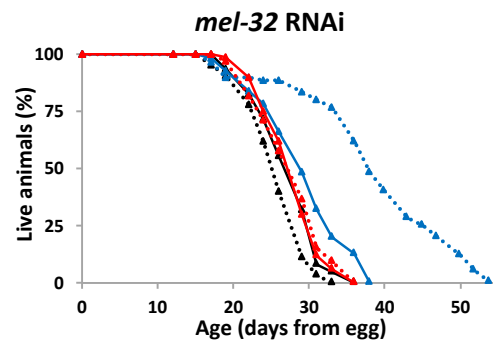

**Figure 3: *Fmo-2* interacts with OCM genes to regulate lifespan.** Lifespan analysis comparing the wild-type and FMO-2 OE on empty-vector (EV) and A) *alh-3* RNAi, B) *cth-2* RNAi, C) *sams-1* RNAi and D) *mel-32* RNAi. Statistics in Supplementary Data 5.

218

219

220

221

A

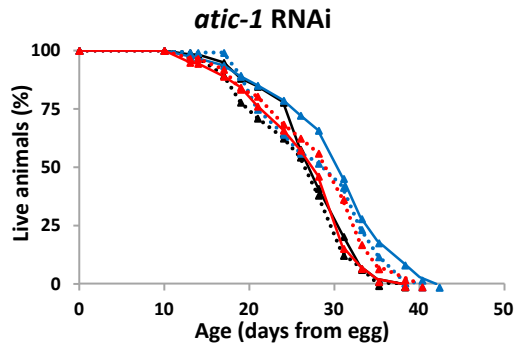

B

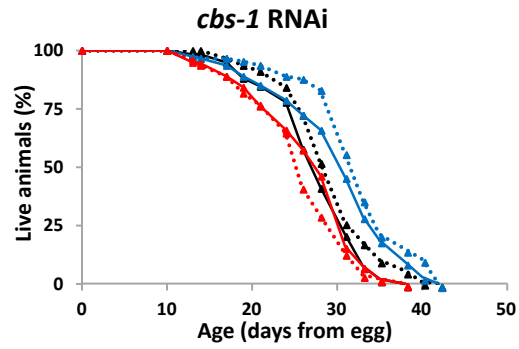

222

223

C

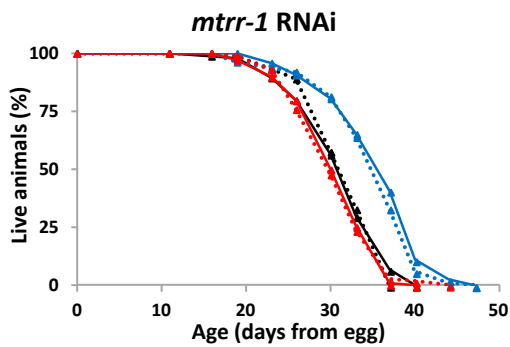

D

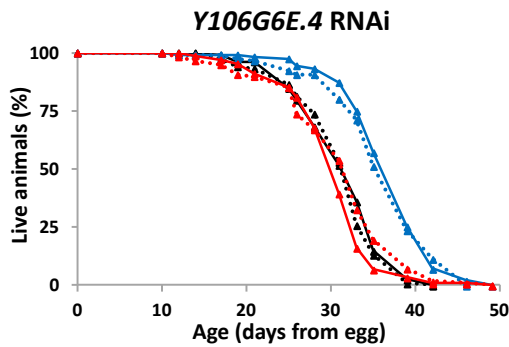

224

225

**Supplementary Figure 3: OCM genes that do not alter worm lifespan.** Lifespan analysis comparing the wild-type and FMO-2 OE on empty-vector (EV) and A) *atic-1* RNAi, B) *cbs-1* RNAi, C) *mtrr-1* RNAi, and D) *Y106G6E.4* RNAi. Statistics in Supplementary Data 5.

226



227 *Fmo-2 influences longevity by modulating the transmethylation pathway*

228 Our data are consistent with a model where *fmo-2* interacts with OCM to regulate  
229 longevity and stress resistance. Previous studies identify multiple pathways that affect longevity  
230 and are also involved in OCM, including nucleotide metabolism, the transsulfuration pathway,  
231 and the transmethylation pathway<sup>11,16,17</sup>. Some of these pathways are also implicated in  
232 modifying longevity downstream of dietary restriction in multiple animal models<sup>16,17,33</sup>, making it  
233 likely that one or more of these pathways are in the same functional pathway as *fmo-2*.  
234 However, the metabolic consequences of *fmo-2* expression on these pathways are not clear  
235 based on the changes observed in our targeted metabolomics analysis alone, as the data only  
236 show metabolic changes at a single time point and most of the metabolites within OCM are  
237 intermediate metabolites. The stress resistance and lifespan results further complicate  
238 interpretation as some genes do not affect these phenotypes and some have effects that are  
239 independent of *fmo-2*.

240 To help determine the biological relevance of the changes we observed in the OCM  
241 network following *fmo-2* expression, we applied a computational model (**Supplementary Data**  
242 **6**) to predict how enzyme expression (**Supplementary Data 7**) changes may affect the output  
243 fluxes of OCM. The model assumes a steady-state mass balance of fluxes in the reactions  
244 illustrated in **Figure 4A**. This simple model includes eight reaction fluxes and five fluxes  
245 representing transport of methionine (met), tetrahydrofolate (thf), s-adenosylmethionine (sam),  
246 cysteine (cys), and 5,10-methylenetetrahydrofolate (5,10thf) into and out of the folate cycle and  
247 the methionine cycle. The model output fluxes represent important inputs for the nucleotide  
248 metabolism, the transsulfuration pathway, and the transmethylation pathway, each of which are  
249 reported to be important for influencing the aging process<sup>11,16,17</sup> and are potential key targets for  
250 the *fmo-2*-mediated longevity response. The stoichiometric coefficients for the reaction and  
251 transport processes in this system are stored in the matrix **S** (**Supplementary Data 8**), where  
252 under steady-state conditions  $S \cdot \mathbf{J} = \mathbf{0}$ , where  $\mathbf{J}$  is the vector of fluxes<sup>34,35</sup>. The entries in the

253 vector **J** and matrix **S** are defined in **Figure 4A**. Vectors that satisfy the mass-balance  
254 relationship  $S \cdot \mathbf{J} = \mathbf{0}$  are said to belong to the nullspace of **S**. To predict how changes in the  
255 expression of genes for the enzymes catalyzing the reactions in this network may affect the  
256 output fluxes, we projected the gene expression data (**Supplementary Data 7**) onto the  
257 nullspace of **S** (details are provided in the Methods). This projection predicts an inverse  
258 correlation between *fmo-2* expression and flux through methylation reactions, where the  
259 methylation flux is predicted to be reduced in FMO-2 OE and increased in FMO-2 KO compared  
260 to wild type (**Figure 4B, Supplementary Figure 4**). This analysis does not predict correlative  
261 changes to flux through nucleotide metabolism or the transsulfuration pathway.

262         Based on this analysis, we hypothesized that artificially decreasing the flux through  
263 methylation should replicate FMO-2 OE longevity in the wild type and FMO-2 KO strains, while  
264 not affecting the FMO-2 OE worms. *Sams-1* encodes for s-adenosylmethionine synthase and is  
265 involved in the conversion of methionine into s-adenosylmethionine (SAM). Suppression of  
266 *sams-1* has been previously shown to decrease SAM level<sup>36</sup> and increase longevity<sup>17</sup>. We find  
267 that *sams-1* RNAi recapitulates FMO-2 OE lifespan extension in the wild type and FMO-2 KO  
268 worms while not affecting FMO-2 OE lifespan (**Figure 3C**). Our data are consistent with  
269 previous studies showing that knockdown of *sams-1* fails to further extend the lifespan of  
270 genetic DR model *eat-2* mutants<sup>17</sup>, thereby placing *sams-1* knockdown in the same functional  
271 pathway as FMO-2 OE.

272         To validate the model metabolically, we used the abundance level of SAM and s-  
273 adenosylhomocysteine (SAH) from our targeted metabolomics analysis to calculate the  
274 SAM/SAH ratio. The SAM/SAH ratio is used as a biomarker for methylation potential, where a  
275 decrease in the ratio suggests a hypomethylated state and an increase suggests a  
276 hypermethylated state<sup>37,38</sup>. Consistent with our computational model prediction, we observed a  
277 reduction in the SAM/SAH ratio for FMO-2 OE (hypomethylation) and an increase in the ratio for  
278 FMO-2 KO (hypermethylation) compared to the wild type (**Figure 4C**). Overall, our

279 computational model prediction and experimental data support the hypothesis that *fmo-2*  
280 expression reduces flux through the transmethylation pathway, and that this reduction extends  
281 worm lifespan.

282

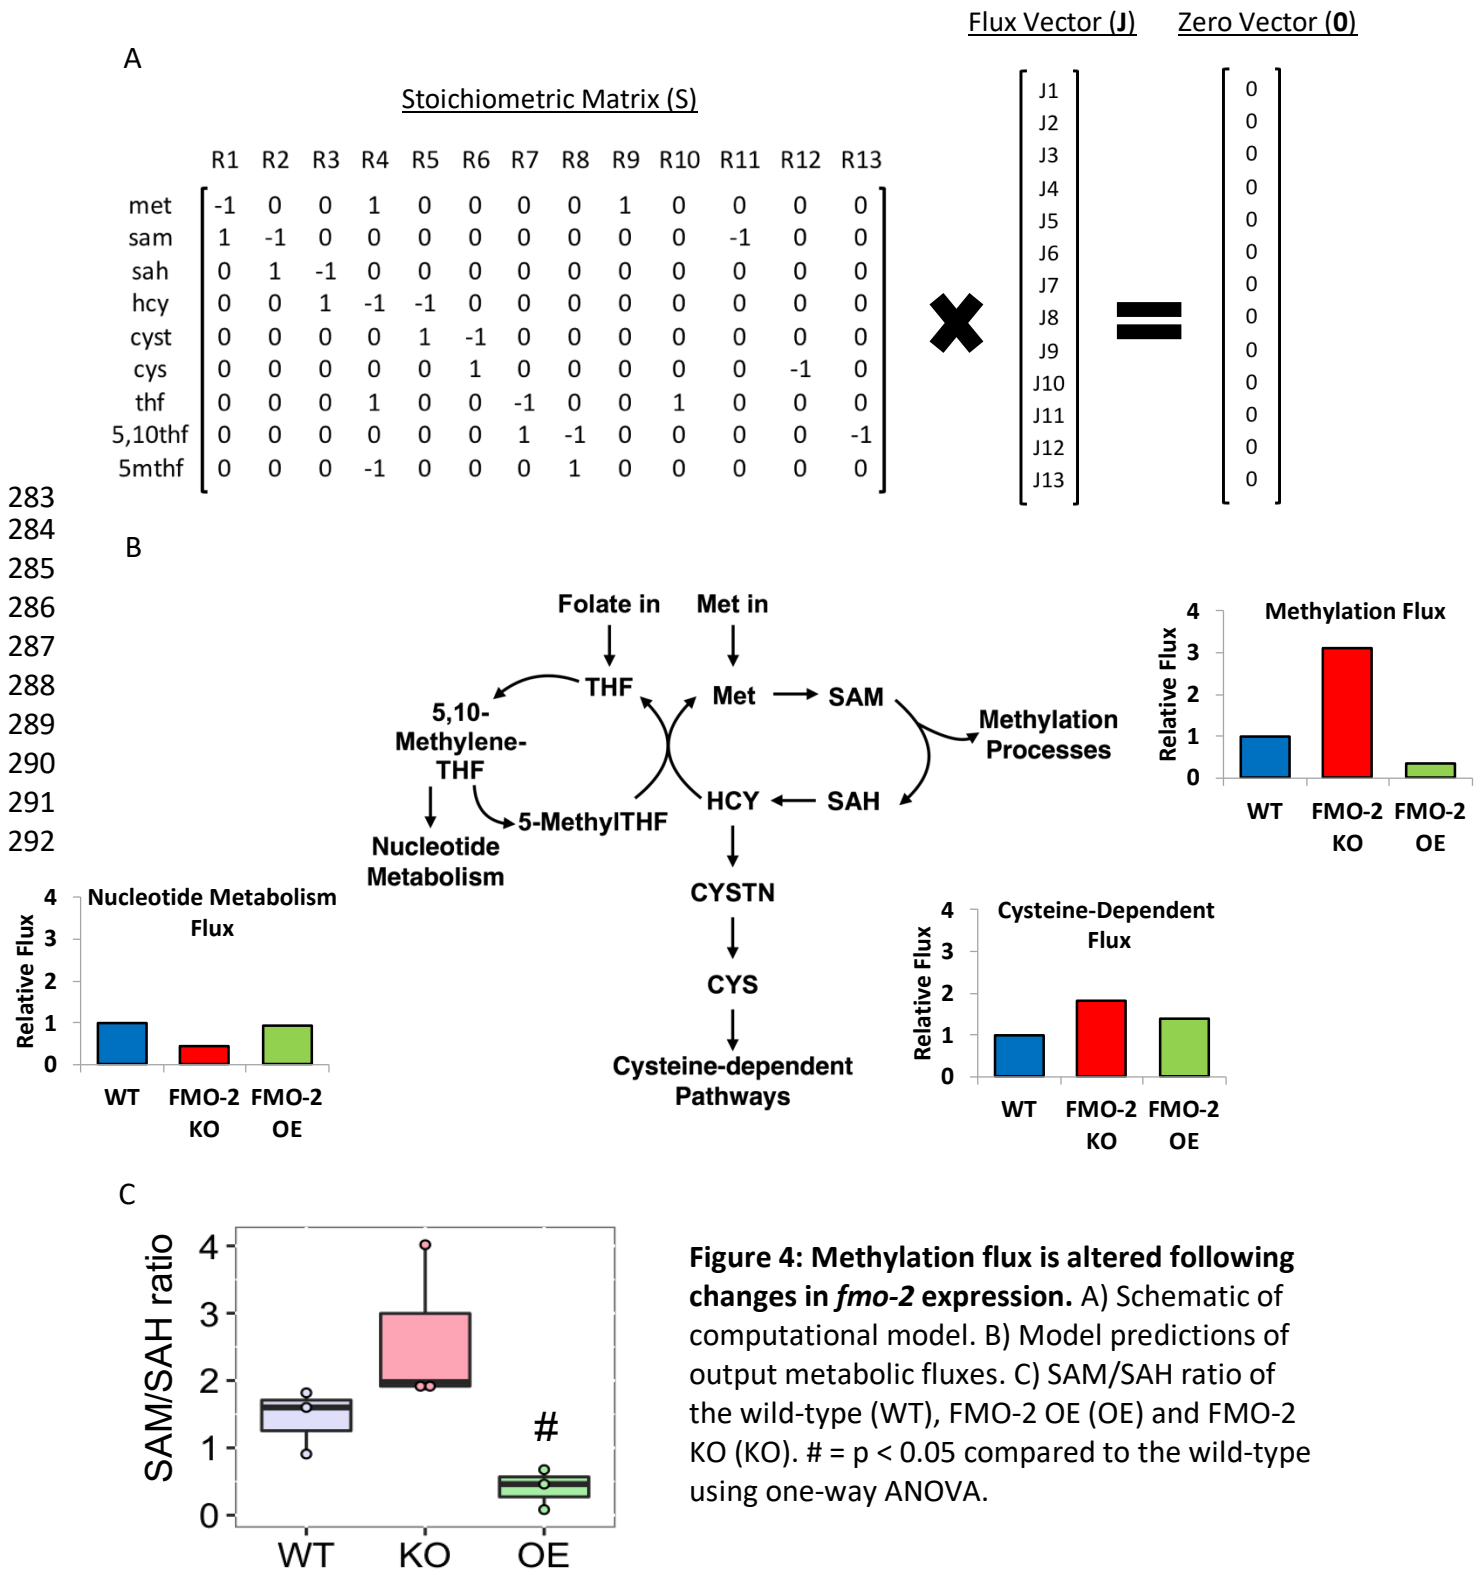

293  
294

A

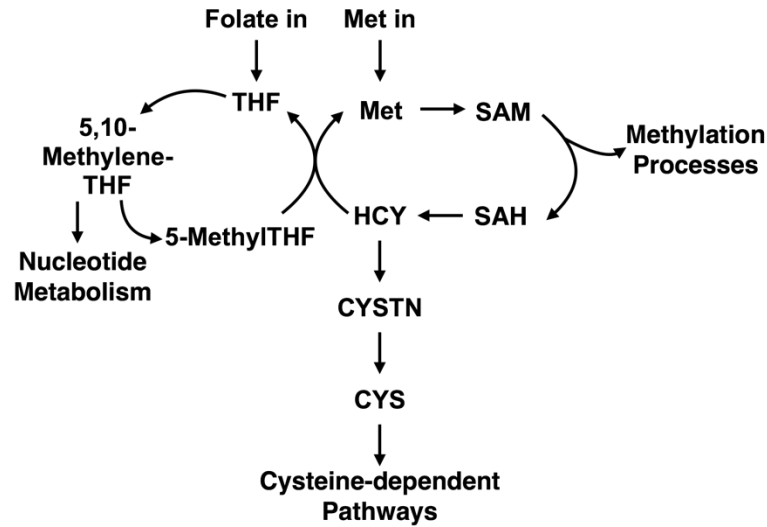

B

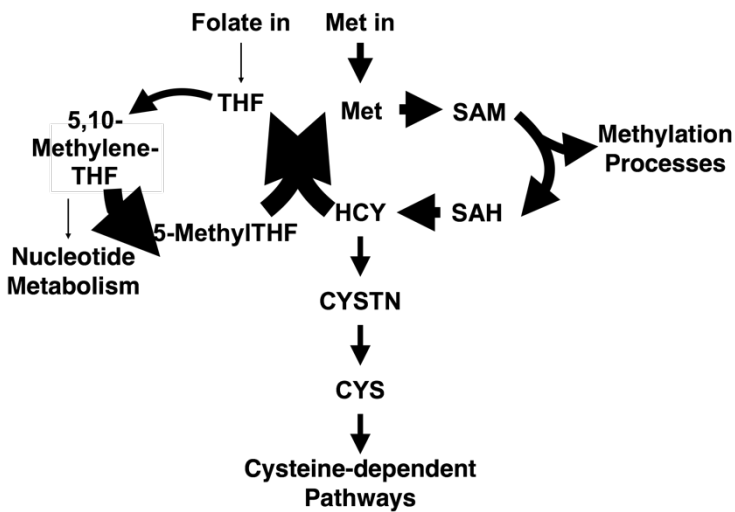

C

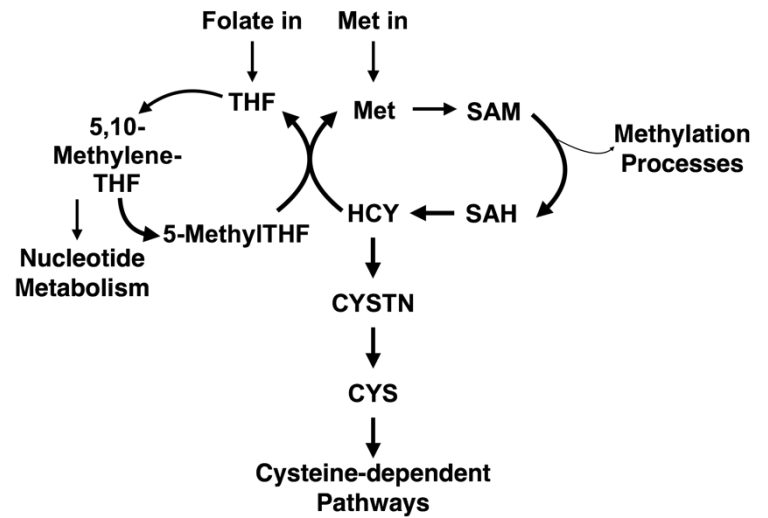

**Supplementary Figure 4: Computational model predicts reduced flux through methylation processes.** Model predictions of OCM fluxes for A) the wild-type, B) FMO-2 OE, and C) FMO-2 KO after normalization to the wild-type. Arrow weights represent changes in each flux relative to the wild type, which is set to be equal to 1.

295 Mammalian FMO metabolomics analysis reveals tryptophan as a substrate of FMO-2

296 Our data thus far suggest a model where *fmo-2* interacts with OCM to modulate the  
297 aging process. However, since FMOs are promiscuous enzymes that oxygenate many  
298 nucleophilic atoms, the mechanism by which *fmo-2* induction leads to changes in OCM is not  
299 readily evident. FMOs are known as xenobiotic metabolizing enzymes, with many known  
300 exogenous targets and few known endogenous targets<sup>1</sup>. Despite extensive knowledge on their  
301 enzymatic activity and recent data linking FMOs to endogenous metabolism, no link between  
302 specific and systemic metabolism has been made. We hypothesize that a limited number of  
303 FMO targets are causal in FMO-2's effects on OCM and, importantly, on the aging process.

304 Due to the high degree of conservation of catalytic residues between mouse FMOs and  
305 CeFMO-2 (**Figure 5A**), we referred to our previously published targeted metabolomics of mouse  
306 FMO overexpressing (OE) HepG2 cells to determine potential metabolic targets of FMO-2<sup>10</sup>.  
307 Our selection criteria for putative substrates of FMO-2 included identifying metabolites that had  
308 decreased abundance in at least three of the five FMO OE cell lines to pDEST controls. We use  
309 this stringent criteria to identify the most well-conserved targets of FMOs, given that no data  
310 exist for CeFMO-2 targets. Using this approach, we identified tryptophan and phenylalanine as  
311 potential substrates of FMOs (**Figure 5B**). To determine if either of these are substrates of  
312 FMO-2, we measured the enzymatic activity of isolated FMO-2 protein in the presence of  
313 varying concentrations of tryptophan and phenylalanine. We find that FMO-2 is active toward  
314 tryptophan at a reasonable  $K_m$  and  $k_{cat}$  ( $K_m: 880 \pm 430 \mu M$ ;  $k_{cat}: 9.7 \pm 1.5 \text{ sec}^{-1}$ ), suggesting that  
315 tryptophan is a viable substrate of FMO-2 (**Figure 5C, Supplementary Data 9**). FMO-2 was  
316 also active toward phenylalanine, but enzymatic activity did not become apparent until 10 mM,  
317 suggesting that phenylalanine is not likely a good endogenous substrate of FMO-2 (**Figure 5D**).  
318 Since FMO-2 has no previously reported activity toward tryptophan, we used LC-MS with 100,  
319 250, and 500  $\mu M$  tryptophan under the same enzymatic conditions to determine the product of  
320 tryptophan oxygenation. Our resulting data show the presence of N-formylkynurenine in a

321 concentration dependent manner in each of the samples, suggesting that is the product formed  
322 by FMO-2 activity toward tryptophan (**Figure 5E**). To determine whether tryptophan is a  
323 conserved substrate of FMOs, we next tested whether mFMO5 can also oxygenate tryptophan.  
324 mFMO5 also shows increased levels of N-formylkynurenine based on HPLC analysis under  
325 tryptophan enzymatic conditions (**Figure 5E, Supplementary Data 10**). Alignment of mFMO5  
326 and CeFMO-2 using ancient mammalian FMO5<sup>39-41</sup> shows that all but one of the catalytic  
327 residues of CeFMO-2 are conserved in mFMO5 (**Figure 5A**), so it follows that they would have  
328 similar activity toward some substrates. The kinetic parameters of FMO-2 toward NADPH,  
329 methimazole, and tryptophan are summarized in **Figure 5F**. The poor substrates (such as  
330 cysteine, phenylalanine, and TMA) and non-substrates of FMO-2 (such as 2-heptanone) are  
331 summarized with either the concentration of substrate at which FMO-2 activity is first detected  
332 or labeled not determined (N.D.) in **Supplementary Data 9**.

333         Based on our initial data linking FMO-2 to OCM, it is important to note that in addition to  
334 being a key process in the kynurenine pathway, the conversion of tryptophan to N-  
335 formylkynurenine precedes the conversion of N-formylkynurenine to kynurenine by  
336 formamidase, a process that releases formate, which is also a carbon source for OCM<sup>42</sup>.  
337 Formate can enter OCM through the folate cycle, thus providing a connection between  
338 tryptophan metabolism, the kynurenine pathway, and OCM. Based on this information, we  
339 hypothesize that the kynurenine pathway is a target of FMO-2 that leads to changes in OCM.

340 A

341

342

|                        |   |            |   |   |   |            |            |            |   |   |   |   |   |   |   |   |
|------------------------|---|------------|---|---|---|------------|------------|------------|---|---|---|---|---|---|---|---|
| <b>AncFMO5</b>         | I | <b>NTS</b> | H | H | T | <b>GNS</b> | <b>NRV</b> | Q          | H | P | I | Q | P | A | I | M |
| <b>C.elegans_FMO-2</b> | I | <b>NTS</b> | H | H | A | <b>GNS</b> | P          | K          | L | A | H | P | I | Q | P | S |
| <b>Mouse_FMO4</b>      | T | N          | V | C | Q | F          | L          | <b>GNT</b> | S | R | S | P | K | F | I | S |
| <b>Mouse_FMO1</b>      | S | <b>NSS</b> | F | L | T | <b>GNS</b> | S          | R          | V | R | E | P | I | K | P | S |
| <b>Mouse_FMO3</b>      | T | <b>NSS</b> | H | H | I | <b>GNS</b> | S          | R          | V | K | E | P | V | Q | S | A |
| <b>Mouse_FMO2</b>      | T | <b>NTS</b> | H | H | I | <b>GNS</b> | S          | R          | I | K | E | P | I | Q | P | S |
| <b>Mouse_FMO5</b>      | I | <b>NTS</b> | H | H | T | <b>GNS</b> | <b>NRV</b> | Q          | H | P | I | Q | P | A | I | M |

B

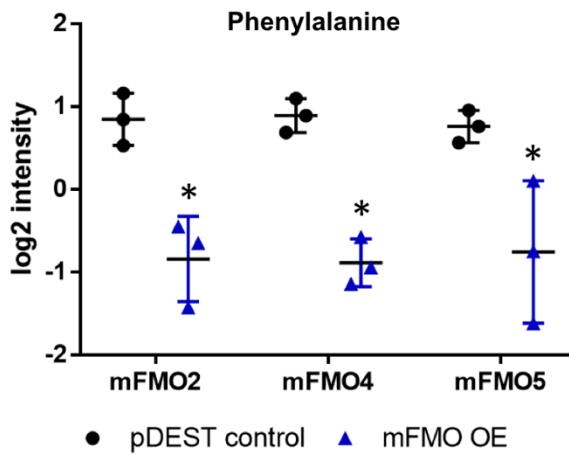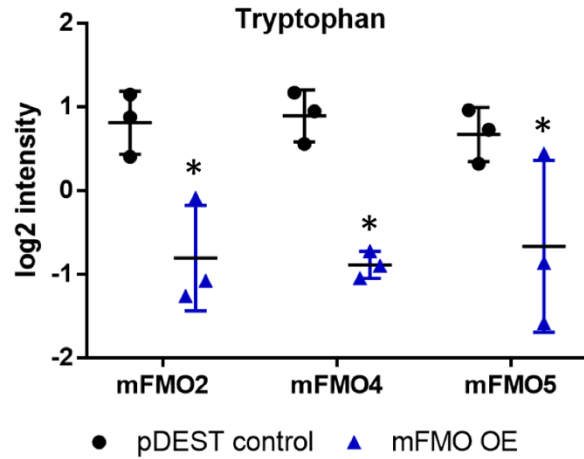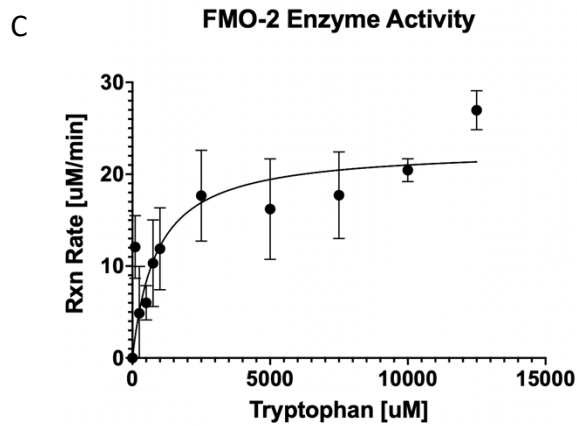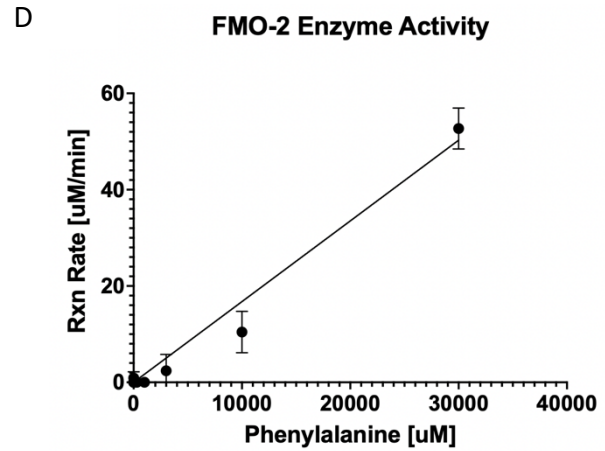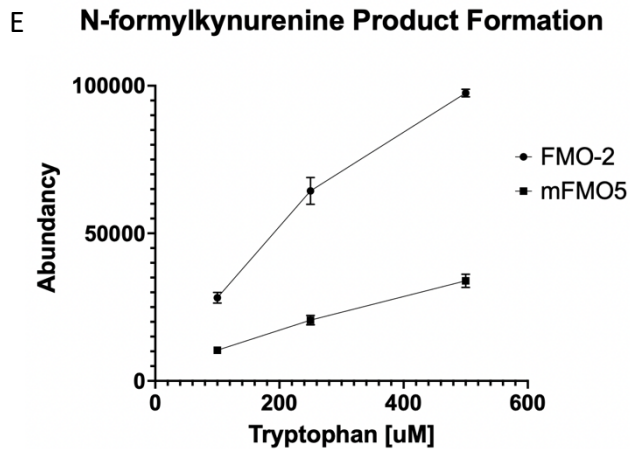



343  
344  
345  
346

F

| Substrate   | $K_m$ (mM)  | $k_{cat}$ (sec <sup>-1</sup> ) | Catalytic Efficiency (sec <sup>-1</sup> M <sup>-1</sup> ) |
|-------------|-------------|--------------------------------|-----------------------------------------------------------|
| NADPH       | 2.50 ± 1.24 | 264 ± 98                       | 105000 ± 65000                                            |
| Methimazole | 1.92 ± 1.14 | 13.0 ± 6.0                     | 6800 ± 5100                                               |
| Tryptophan  | 0.88 ± 0.43 | 9.7 ± 1.5                      | 11000 ± 5000                                              |

**Figure 5: Mammalian FMO metabolomics analysis reveals the tryptophan/kynurenine pathway as a target of FMO-2.** A) Conserved catalytic residues between CeFMO-2 and mouse FMOs (indicated by red arrows). B) The level of phenylalanine and tryptophan present in HepG2 cells expressing pDEST control vector, mFMO2, mFMO4, and mFMO5. \* represents  $p < 0.05$  by paired t-test. C-D) The reaction rate by concentration for purified CeFMO-2 enzyme toward tryptophan and phenylalanine at 30°C. E) The abundance of N-formylkynurenine based on HPLC analysis of CeFMO-2 and mFMO5 activity toward 100, 250, and 500  $\mu$ M tryptophan at 30°C. F) Summary table of Michaelis-Menton parameters for CeFMO-2 cofactor and substrates.

347  
348

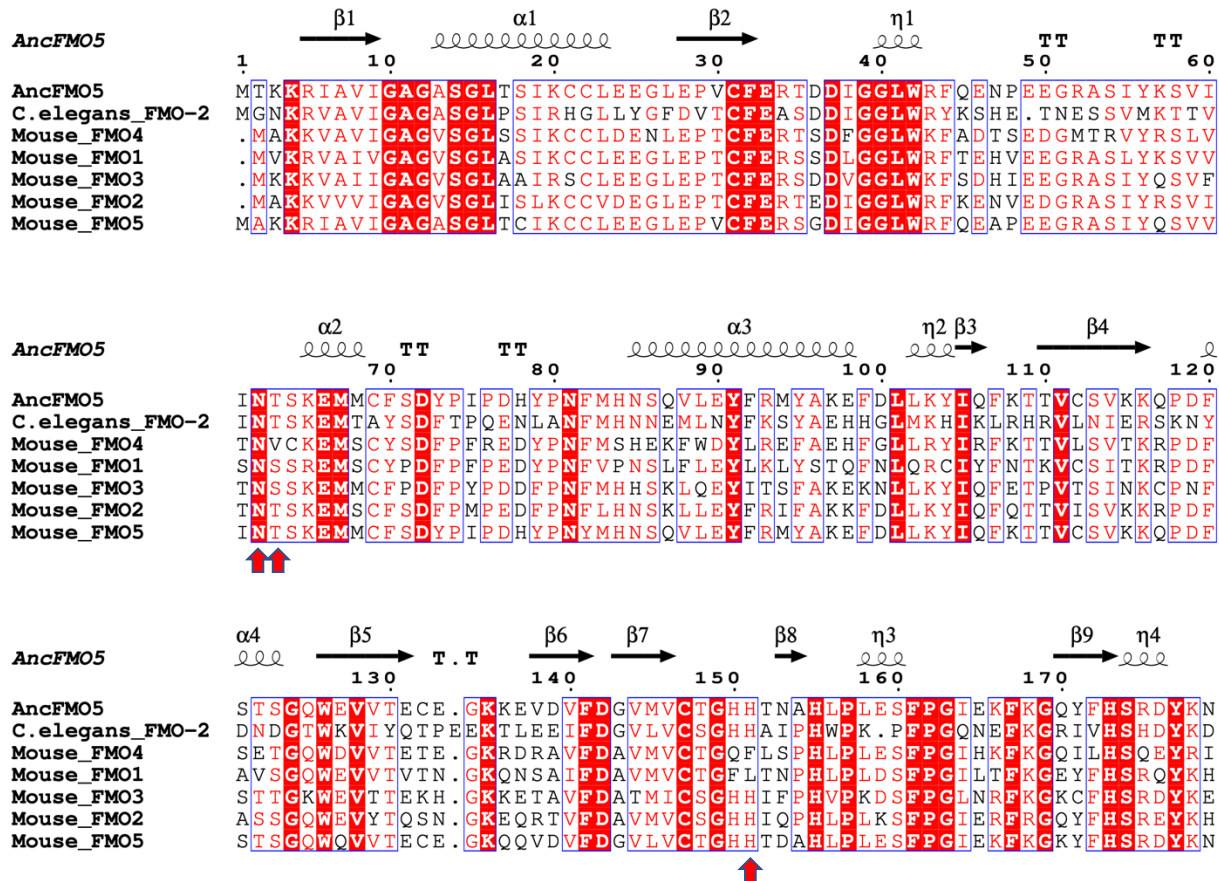

349  
350  
351  
352  
353

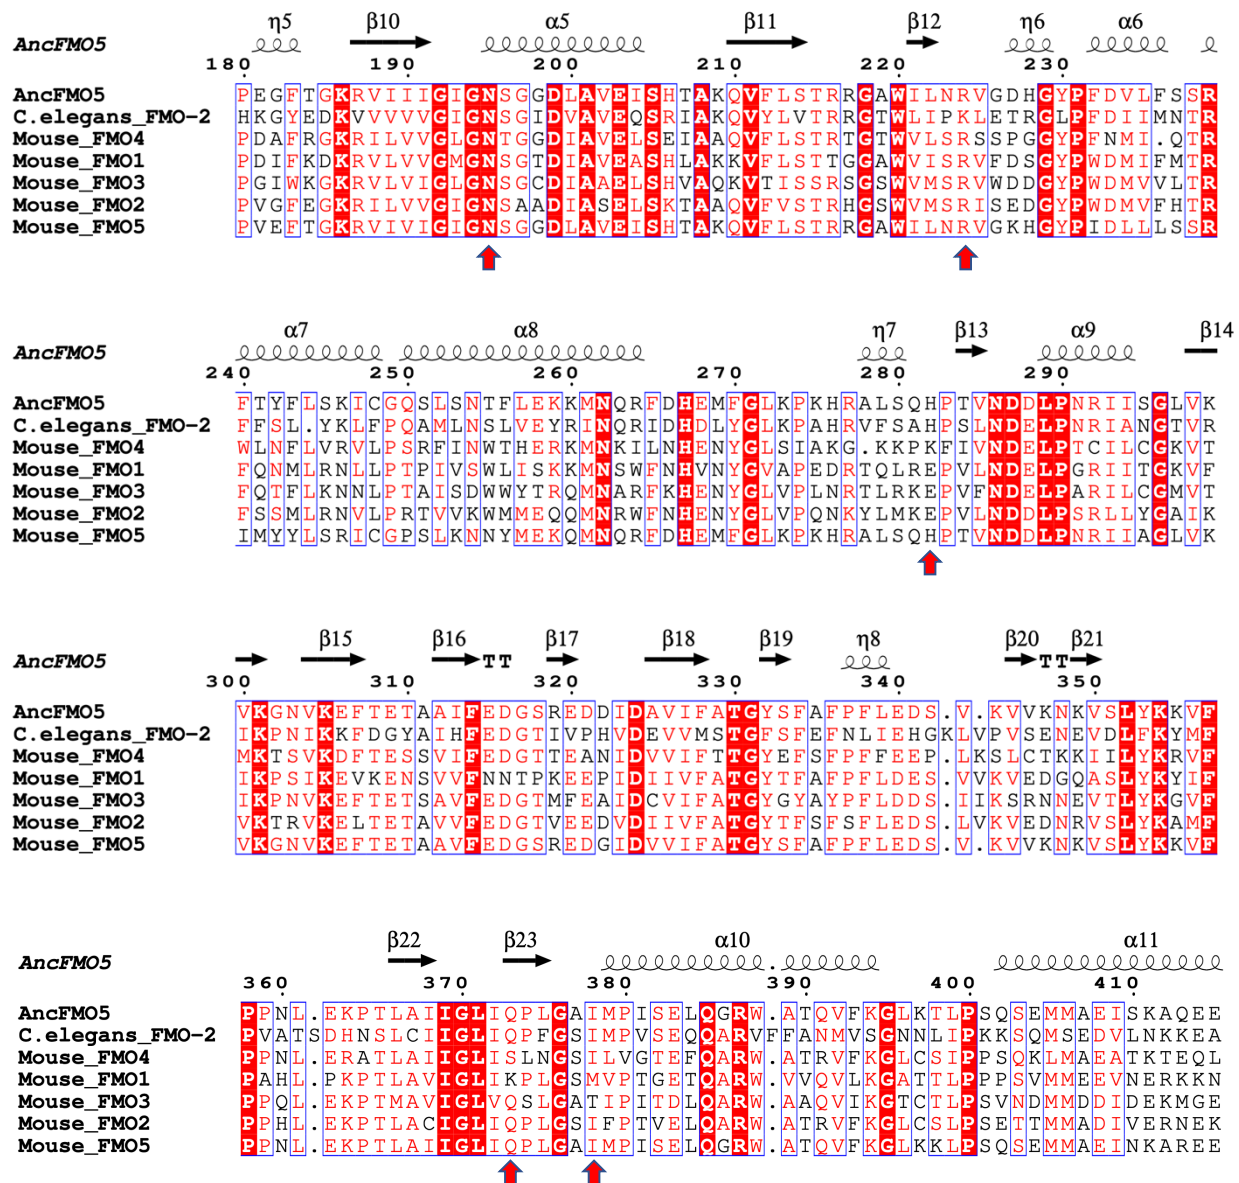

354

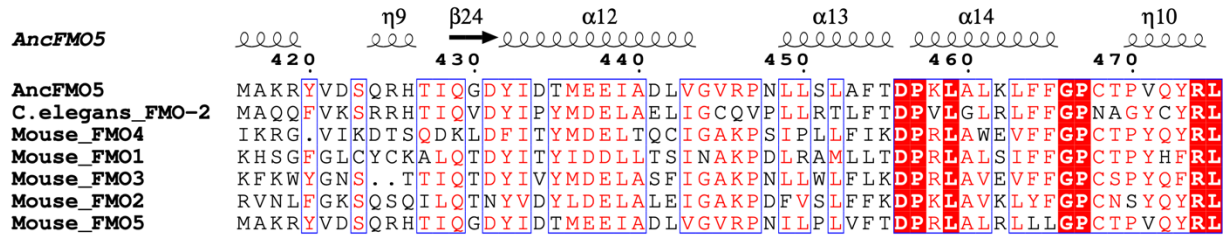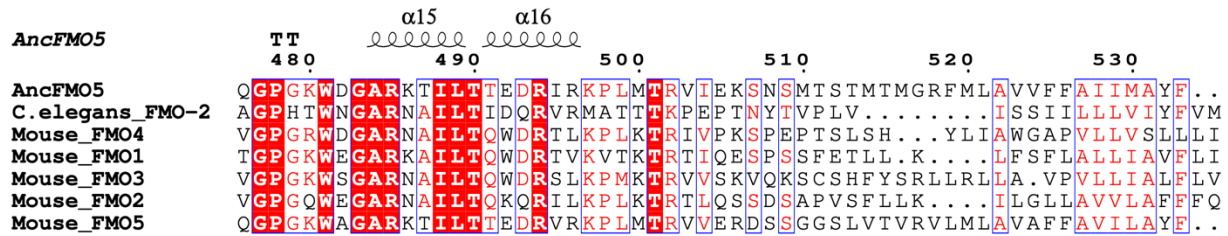

355  
356  
357  
358  
359  
360  
361  
362

**Supplementary Figure 5: Conservation of catalytic residues between murine FMO5 and *C. elegans* FMO-2.** Arrow heads indicate catalytic residues as determined by the crystal structure of ancestral mammalian FMO5 solved by Nicoll, et al. Overall identity of murine FMO5 and *C. elegans* FMO-2 is approximately 43%. Alignment figures were generated using Clustal Omega and ESPrpt 3.0.

363 To test this hypothesis, we assessed whether genes involved in tryptophan metabolism  
364 interact epistatically with FMO-2 (**Figure 6A**). Like our RNAi analyses of the OCM genes, we  
365 observed changes in stress resistance of the wild type and FMO-2 OE following the knockdown  
366 of genes involved in the kynurenine pathway (**Figures 6B, C**). Similarly, we observed changes  
367 in the lifespan of the wild type, FMO-2 OE, and FMO-2 KO worms under the same conditions  
368 (**Figures 6D, E**), as assessed using log-rank test with a cutoff threshold of  $p < 0.0001$ <sup>28</sup>  
369 compared to the empty vector (EV) controls. Here, we again observed a separation between the  
370 regulation of stress resistance and lifespan under *kmo-1* and *tdo-2* knockdown (**Figures 6B-E**).  
371 Knocking down *kmo-1* increases the resistance to paraquat in the wild type (**Figure 6B**), but it  
372 decreases the lifespan of the wild type, FMO-2 OE, and FMO-2 KO (**Figure 6D**). These data  
373 suggest that *kmo-1* knockdown may be beneficial for resistance against paraquat, but that *kmo-*  
374 *1* expression is necessary for normal worm longevity. Knocking down *tdo-2* abrogates paraquat  
375 resistance in FMO-2 OE (**Figure 6C**), but extends the lifespan of the wild type, FMO-2 OE, and  
376 FMO-2 KO (**Figure 6E**). *Tdo-2* knockdown was previously reported to extend lifespan by  
377 inhibiting tryptophan degradation and thereby improving the regulation of proteotoxicity<sup>19</sup>.

378 In addition, knocking down *kynu-1* did not affect paraquat resistance of the worms  
379 (**Supplementary Figure 6A**), but it partially recapitulated the FMO-2 OE lifespan phenotype in  
380 the wild type and FMO-2 KO without affecting FMO-2 OE lifespan (**Figure 6F**), consistent with  
381 *kynu-1* functioning in the same pathway as *fmo-2*. The knockdown of *afmd-1* did not affect the  
382 stress resistance of the worms (**Supplementary Figure 6B**), but it extended the lifespan of the  
383 wild type without affecting FMO-2 KO and FMO-2 OE, suggesting that *afmd-1* requires *fmo-2* to  
384 extend lifespan (**Figure 6G**). Knockdown of *nkat-1* did not affect the lifespan or the paraquat  
385 resistance of the wild type, FMO-2 OE, and FMO-2 KO, suggesting that this gene does not  
386 function in the same pathway as *fmo-2* (**Supplementary Figures 6C, D**). Taken together, our  
387 data are consistent with the hypothesis that the kynurenine pathway is a target of FMO-2.

388

389

A

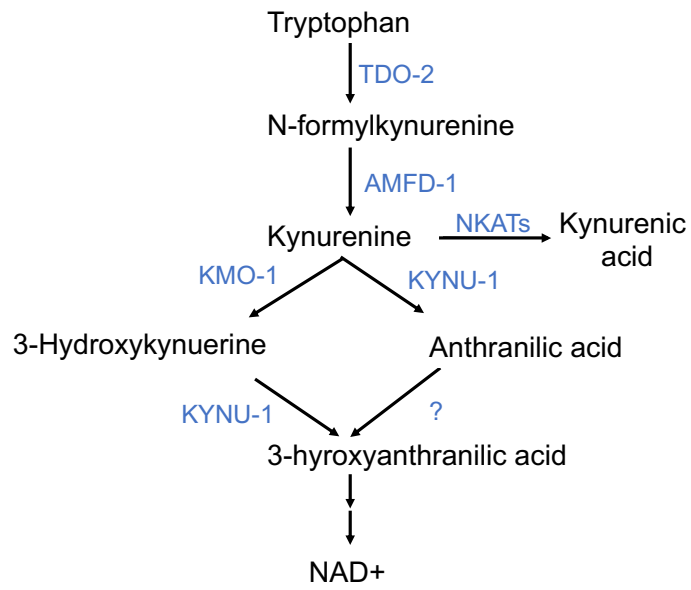

390

391

392

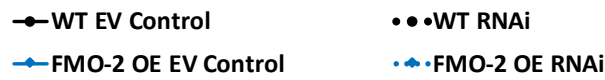

393

B

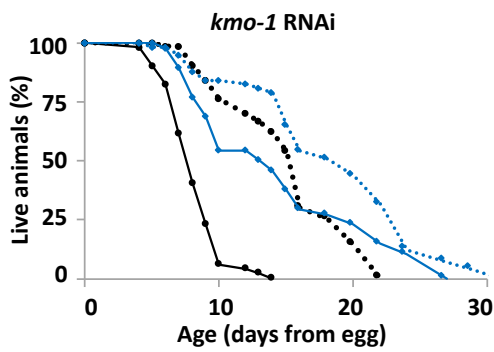

C

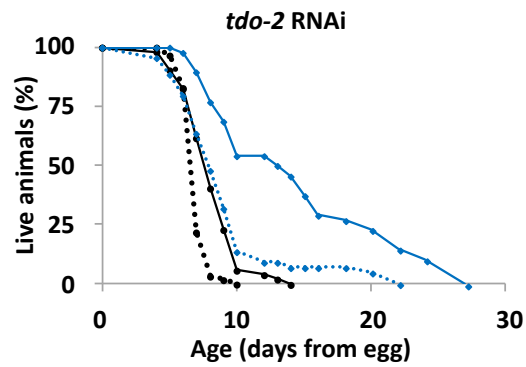

394

395

396

397

398

399

400

401

402

403

404

405

406

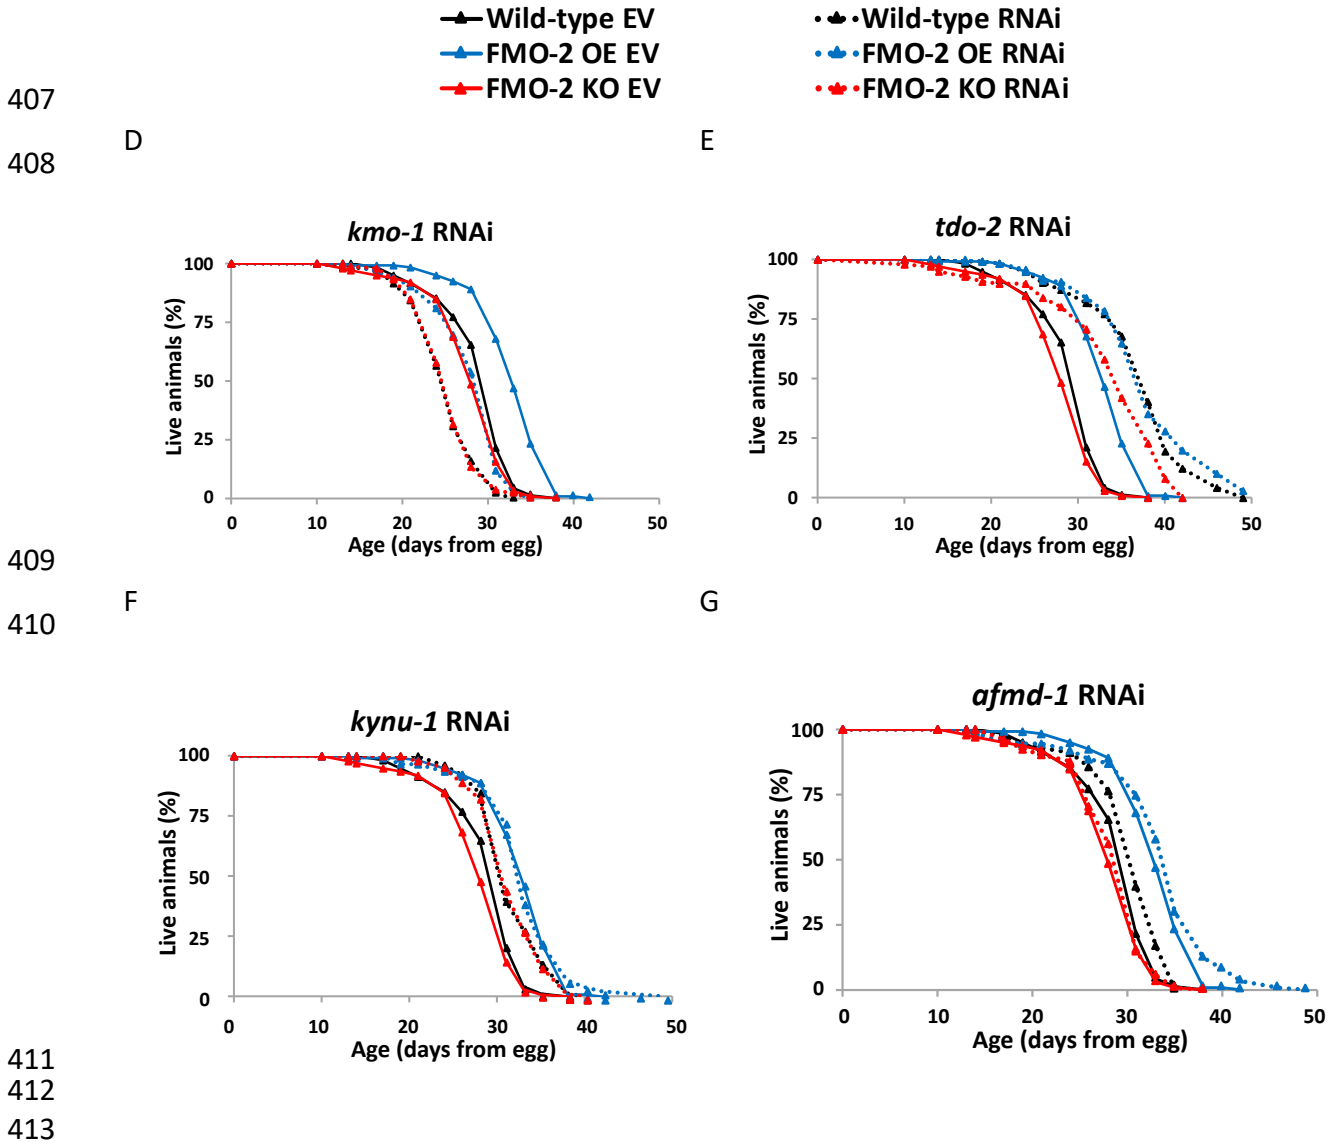

**Figure 6: *Fmo-2* interacts with kynurenine metabolism to regulate stress resistance and lifespan.** A) Diagram of kynurenine pathway. B-C) 5 mM paraquat stress assay (from L4 stage) comparing the survival of the wild-type and FMO-2 OE on empty vector (EV) and B) *kmo-1* RNAi and C) *tdo-2* RNAi, D-G) Lifespan assay comparing the survival of the wild-type, FMO-2 OE, and FMO-2 KO on EV and D) *kmo-1* RNAi, E) *tdo-2* RNAi, F) *kynu-1* RNAi, and G) *afmd-1* RNAi. Statistics in Supplementary Data 4 for stress assays and Supplementary Data 5 for lifespans.

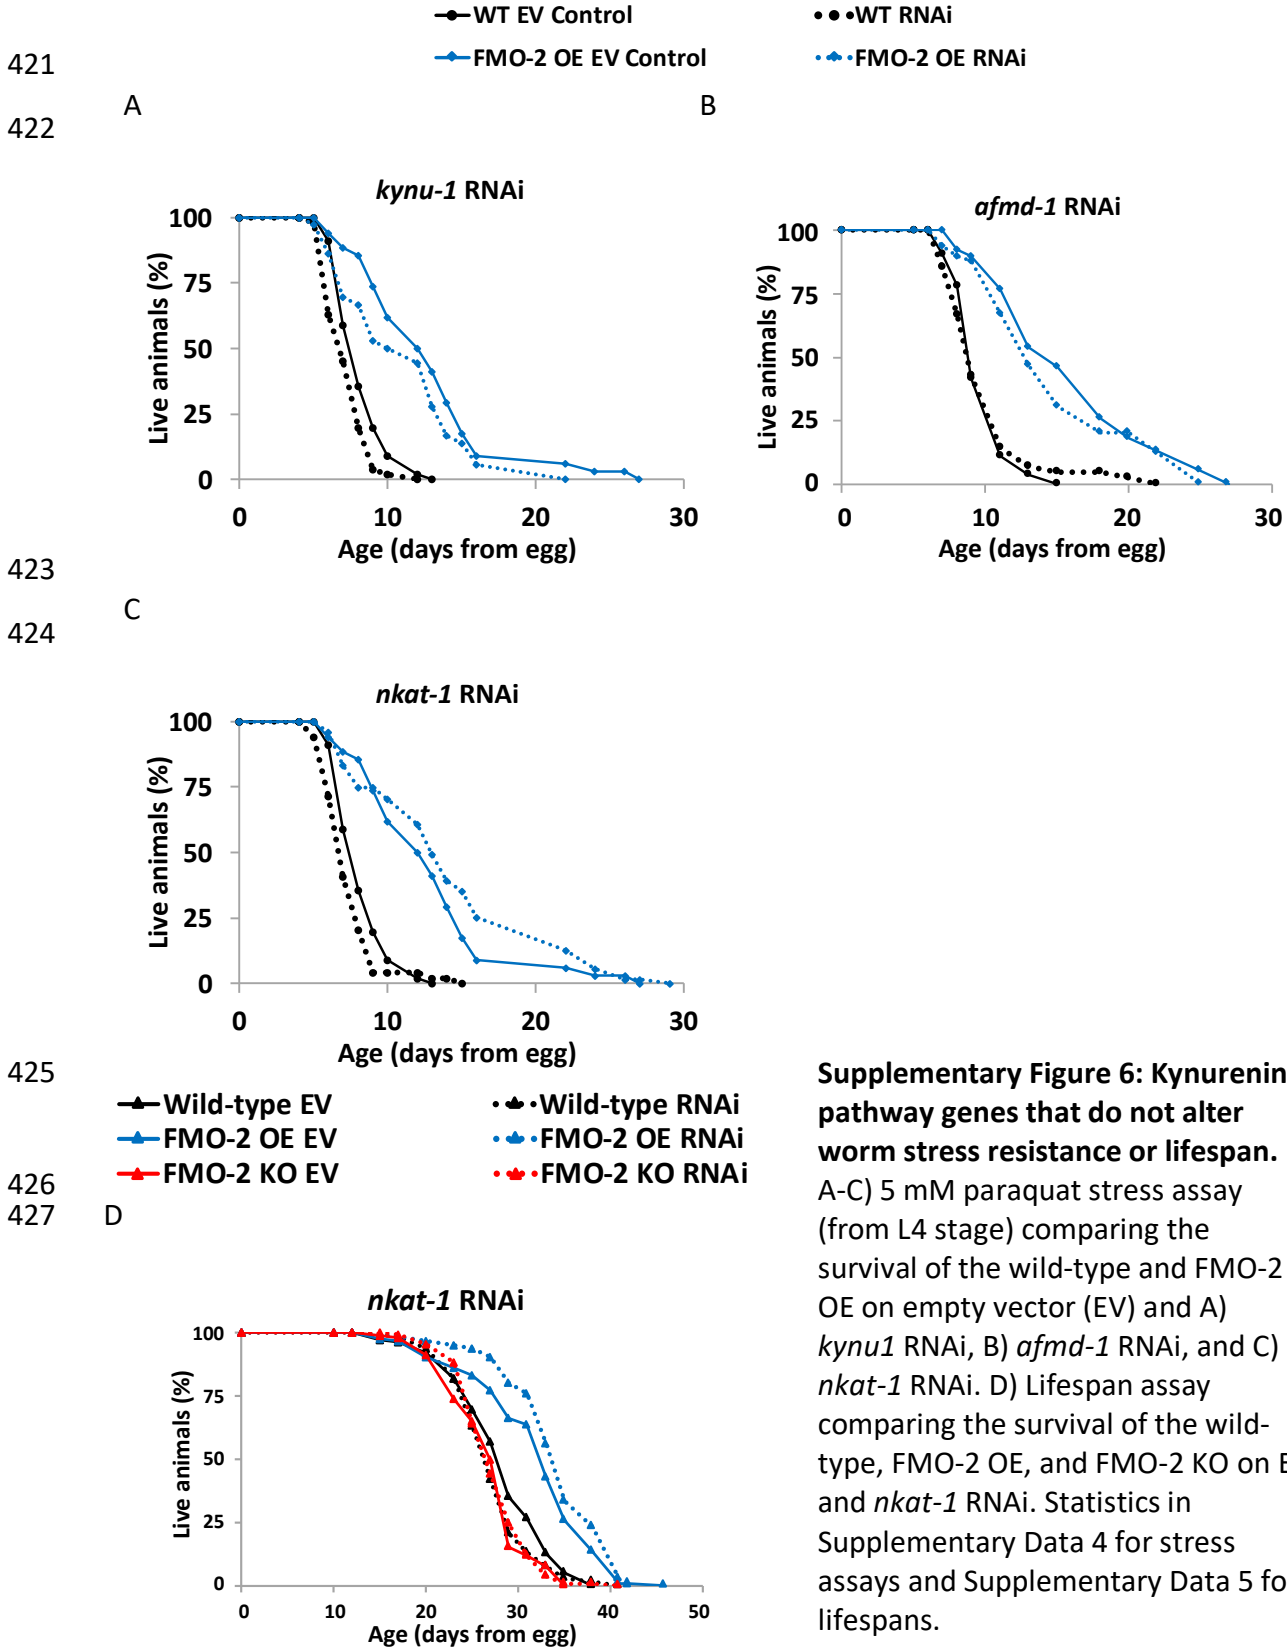

429 **Discussion**

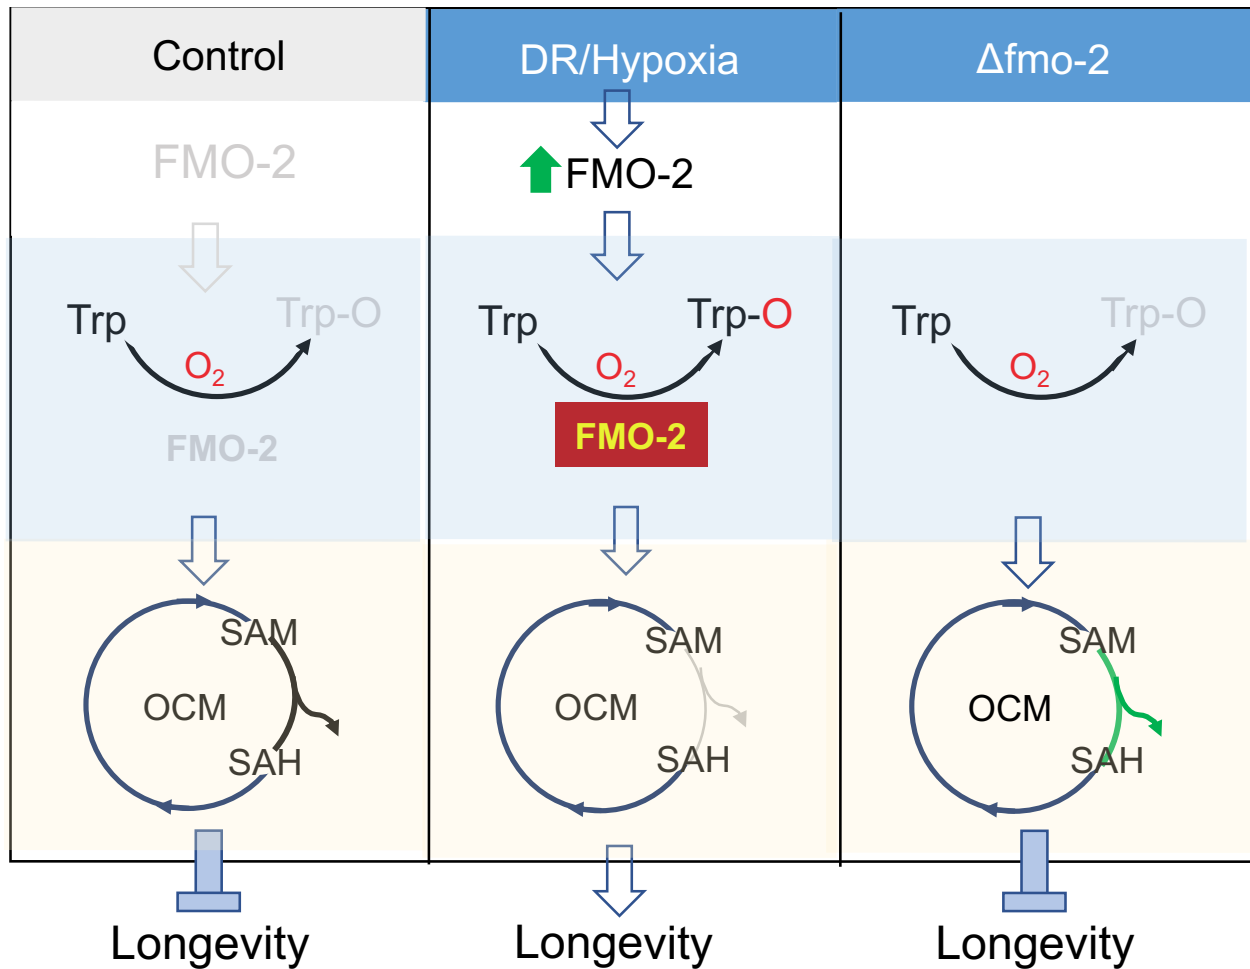

430  
431  
432  
433

**Figure 7: Proposed model.** In control conditions, there is very low *fmo-2* expression, leading to low levels of tryptophan metabolism/kynurenine production through FMO-2, and maintaining normal flux through one carbon metabolism and normal lifespan. When *fmo-2* is induced, either genetically through overexpression or environmentally by DR or hypoxia, FMO-2 oxygenates tryptophan, leading to increased kynurenine production and decreased methylation output flux through OCM, thereby extending nematode lifespan. When *fmo-2* is absent, these metabolic changes do not occur, even under hypoxia or DR, preventing an extension in lifespan. The gray line represents decreased flux and the green line represents increased flux.



434 For half a century, FMOs have been primarily classified as xenobiotic enzymes.  
435 However, the mechanisms by which these enzymes affect endogenous metabolism are still not  
436 well studied. Based on our data, we propose a model where overexpression of *fmo-2*, similar to  
437 levels that we observe under hypoxia and dietary restriction, is sufficient to remodel metabolism  
438 in the nematode *C. elegans* (**Figure 7**). Here, we show that *Cefmo-2*, a novel regulator of  
439 longevity that is critical for lifespan extension and stress response under dietary restriction and  
440 hypoxia, interacts with both tryptophan and one-carbon metabolism to confer longevity and  
441 health benefits. We find that modulating the expression of a single oxygenating protein can have  
442 a multitude of metabolic and physiological effects, similar to the activation of transcription  
443 factors and kinases. Our results suggest a broader, more significant role for FMO-2, and FMOs  
444 in general, than previously known. Furthermore, we establish experimental evidence of FMO  
445 orthology from *C. elegans* to mammals since both CeFMO-2 and mFMO5 have similar activity  
446 toward tryptophan, suggesting that through this substrate they may perform similar metabolic  
447 roles in both animals.

448 Our resulting data are consistent with a model where the reduction of flux through the  
449 methylation pathway leads to longevity benefits. By projecting gene expression data to a  
450 stoichiometric model for OCM metabolism, we predict that FMO overexpression results in a  
451 reduction in methylation flux. This model-based prediction based on gene expression data is  
452 experimentally validated, indicating that this approach can be a powerful tool to simplify the  
453 understanding of complex metabolic pathways and to study the biology of aging. Perturbation in  
454 the SAM/SAH ratio by either the supplementation of metformin or a mutation in *sams-1* extends  
455 worm lifespan<sup>13,17</sup>. While multiple studies report that methionine restriction robustly extends  
456 lifespan across species, including worms, flies, and mice<sup>13,43,44</sup>, others show that exogenous  
457 supplementation of methionine is not detrimental to lifespan<sup>45</sup>. This suggests that methionine  
458 utilization rather than methionine abundance is a key factor that influences the aging process.

459           Although suppressing *sams-1* expression phenocopies FMO-2 OE lifespan in the wild  
460 type and FMO-2 KO, doing so reduces the stress resistance of the worms against paraquat.  
461 This separation of lifespan and stress resistance is occasionally observed under other long-lived  
462 conditions<sup>46</sup>. It is unclear if simply reducing methylation is sufficient to promote longevity  
463 benefits, or if this mechanism requires suppression of specific methylation processes. It will be  
464 important for future studies to determine how cells regulate different methylation fluxes under  
465 *sams-1* knockdown and decreased overall methylation. One potential mechanism under this  
466 genetic condition could be that specific methyltransferases that are essential for survival will  
467 have higher affinity to methyl groups to outcompete other nonessential or deleterious  
468 methyltransferases.

469           We note that while our data suggest methylation as the key downstream effector of  
470 FMO-2, we have not excluded the possibility that the transsulfuration pathway may also be  
471 involved in this mechanism. The transsulfuration pathway is reported to be a necessary and  
472 sufficient component of DR-mediated lifespan extension in flies<sup>16</sup>. Similarly, knocking down *cth-*  
473 *2*, a gene involved in this pathway, abrogates the lifespan extension phenotype in FMO-2 OE  
474 (**Figure 3B**). It will be interesting to determine the mechanistic relationship between the  
475 transsulfuration and transmethylating pathways in regulating longevity.

476           Our data also support an interaction between *fmo-2* and tryptophan metabolism to  
477 influence longevity. These findings are particularly interesting because we identify a putative  
478 endogenous metabolic pathway of FMOs in relation to the aging process. Based on cell line  
479 metabolomics, enzyme kinetics, and HPLC data, there are at least two plausible mechanisms  
480 for how oxygenation of tryptophan by FMO-2 can lead to the synthesis of N-formylkynurenine.  
481 First, FMOs across taxa are known to dimerize and form higher order oligomers<sup>47,48</sup>. Therefore,  
482 it is possible that FMO-2 dimerizes and dioxygenates tryptophan forming N-formyl-kynurenine,  
483 which is then converted to kynurenine by formamidase. Second, the same process could be  
484 involved in subsequent oxygenation by FMO-2 monomers, but it is unknown how stable a

485 monoxygenated form of tryptophan would be within the cell, making the first mechanism more  
486 likely. To our knowledge this is the first example of the dioxygenation of a substrate that could  
487 potentially require dimerized FMOs. The mechanism of this reaction and its potential  
488 requirement of dimerized FMOs will be a target of future research. Furthermore, the  
489 dioxygenation of tryptophan by FMOs is especially interesting considering only dioxygenases,  
490 such as *tdo-2*, *ido-1*, and *ido-2*, have been shown to mediate the conversion of tryptophan to N-  
491 formylkynurenine<sup>19</sup>. Regardless, our data implicate tryptophan as a *bona fide in vitro* and likely  
492 *in vivo* substrate of animal FMOs either through dioxygenating or monoxygenating  
493 mechanisms. Although we tested multiple conventional and unconventional FMO substrates,  
494 such as methimazole<sup>47-49</sup> and 2-heptanone<sup>50</sup> (**Supplementary Data 9**), respectively, much work  
495 remains to fully establish the general FMO-2 substrate profile and how it compares to those of  
496 mammalian FMOs beyond the common tryptophan substrate of CeFMO-2 and mFMO5.

497 This is the first report showing the conservation of enzymatic activity toward a potential  
498 endogenous substrate between *C. elegans* and mammalian FMOs. Although FMO5 has been  
499 posited as the ortholog of FMO-2 and the other *C. elegans* FMOs due to it being the most  
500 ancestral mammalian FMO, experimental evidence demonstrating this has been lacking. The  
501 alignment of *C. elegans* FMO-2 with mFMO5 illustrates the highly conserved putative catalytic  
502 residues amongst the FMOs (**Supplementary Figure 5**). This conserved activity is  
503 demonstrated further here in the similar activities of CeFMO-2 and mFMO5 toward tryptophan  
504 as well as the production of N-formylkynurenine from tryptophan. As we show here  
505 metabolomics analysis reveals that multiple human cell lines with overexpression of mFMOs  
506 have less tryptophan<sup>10</sup>. Altogether, our previous data and the data presented here further  
507 suggest that not only is tryptophan a *bona fide* endogenous target of *C. elegans* FMOs but  
508 potentially of mFMOs as well.

509 Our data support a model where the interaction between FMO-2 and tryptophan  
510 metabolism directly or indirectly modulates the metabolite profile of OCM, altering flux patterns

511 that are consistent with our computational model predictions and subsequent genetic analyses.  
512 Further investigation is needed to understand the *fmo-2*-mediated connection between OCM  
513 and tryptophan in regulating lifespan. Based on the knowledge we gained from this study and  
514 previous work, we propose the following possibilities: 1) Oxygenation of tryptophan by FMO-2  
515 alters OCM flux by increasing formate levels as a potential direct link between tryptophan  
516 metabolism and OCM. Formate is a single carbon-containing molecule that can enter the folate  
517 cycle as a carbon source<sup>42</sup>. Formate is generated as a byproduct when kynurenine is  
518 synthesized from N-formylkynurenine by formamidase<sup>42</sup>. It is possible that increased of formate  
519 levels can confer stress resistance and longevity benefits under metabolically stressful  
520 conditions, such as DR or hypoxia. 2) FMO-2 interacts with the mechanistic target of rapamycin  
521 (mTOR). Dietary restriction leads to inhibition of mTOR signaling, which is a central regulator of  
522 lifespan and aging<sup>51</sup>. Interestingly, both DR- and rapamycin-mediated mTOR inhibition induce  
523 the expression of FMOs. A recent study shows that diaminodiphenyl sulfone (DDS) induces the  
524 expression of *fmo-2* and extends lifespan, but it does not further extend lifespan in combination  
525 with rapamycin<sup>37</sup>. This finding is consistent with the hypothesis that *fmo-2* interacts with mTOR  
526 inhibition to extend lifespan. We show that *fmo-2* interacts with SAM and tryptophan  
527 metabolism, both of which are known to alter mTOR activity<sup>52-54</sup>. Thus, examination into the role  
528 of mTOR in *fmo-2*-mediated lifespan extension is warranted. 3) FMO-2 modulates tryptophan  
529 metabolism and OCM in an independent manner. There is a possibility that there is no  
530 connection between OCM and tryptophan, and FMO-2 targets both pathways independently.

531 Taken together, our study expands the role of FMO-2 from a xenobiotic enzyme to a  
532 metabolic regulator of longevity that has global effects on the metabolome in worms. In  
533 particular, the identification of OCM as a target of FMO-2 has implications outside the aging  
534 field, considering that OCM remodeling has been studied under the context of cancer biology for  
535 more than 70 years<sup>55</sup>. Furthermore, through the identification of tryptophan as a putative  
536 substrate for both CeFMO-2 and mFMO5, this study highlights the conserved importance of

537 FMOs in multiple contexts, including aging and many diseases where OCM and/or the  
538 kynurenine pathway play a role. These findings illustrate the potential for therapeutic targets of  
539 these proteins for treating age-related diseases and/or increasing longevity and healthspan.  
540 This exciting translational potential for the conserved roles of FMOs will be a target for future  
541 research.

542 **Materials and Methods**

543

544 Strains and Growth Conditions

545 Standard *C. elegans* cultivation procedures were used as previously described<sup>4,56</sup>. N2  
546 wild type, KAE9 ((*eft-3p::fmo-2* + *h2b::gfp* + *Cbr-unc-119(+)*), and VC1668 (*fmo-2(ok2147)*)  
547 strains were maintained on solid nematode growth media (NGM) using *E. coli* OP50 throughout  
548 life except where RNAi (*E. coli* HT115) were used. All experiments were conducted at 20°C.

549

550 Metabolomics

551 OP50 bacteria were treated with 0.5% (v/v) paraformaldehyde as previously described<sup>56</sup>  
552 and seeded onto 100 mm NGM plates. Approximately 500 eggs were put on these plates and  
553 grown until they reached late L4 larval stage. The worms were washed off the plates with 10  
554 mL of M9 buffer and were collected in 15 mL conical tubes. The worms were pelleted using a  
555 clinical centrifuge for 1 minute at 150 x g and the supernatant was vacuum aspirated. The  
556 worms were washed once with 10 mL of M9 buffer and then with 10 mL of 150 mM ammonium  
557 acetate to remove phosphates from M9, each time being centrifuged and the supernatant being  
558 aspirated. After these washing steps, the pellets were flash frozen in liquid nitrogen.

559 Metabolites were extracted from pellets by addition of 500 µL of ice-cold 9:1 methanol:  
560 chloroform, followed immediately by probe sonication for 30 seconds with a Branson 450  
561 Sonicator. The resulting homogenates were kept on ice for 5 minutes and were then centrifuged  
562 for 10 minutes at 4000 x g at 4°C. Supernatant was then transferred to autosampler vials for  
563 analysis. Hydrophilic interaction liquid chromatography-electrospray ionization mass  
564 spectrometry (HILIC-LC-ESI-MS) analysis was performed in negative ion mode using an Agilent  
565 1200 LC system coupled to an Agilent 6220 time-of-flight mass spectrometer. Chromatography  
566 was performed as previously described<sup>57,58</sup>, with the exception that the Phenomenex Luna NH2  
567 column used had dimensions of 150 mm x 1.0 mm ID, the flow rate was 0.07 mL/min, and the

568 injection volume was 10  $\mu$ L. Untargeted peak detection and alignment was performed using  
569 XCMS<sup>59</sup>.

570 The resulting metabolomics data were analyzed using Metaboanalyst 4.0  
571 (<http://metaboanalyst.ca>). Within Metaboanalyst, the data were median normalized, adjusted  
572 using auto scaling, and were then subjected to principal component analysis using default  
573 parameters. Pathway analysis was performed using Metaboanalyst's functional analysis  
574 module. P-values and t-scores of each MS peak data were calculated between the wild type  
575 and FMO-2 OE (**Supplementary Data 2**). Mass tolerance was set to 10 parts per million (ppm)  
576 and mummichog algorithm p-value cutoff was set to 0.05. Default parameters were used for  
577 other settings and the analysis was done using the *C. elegans* pathway library.

578 Targeted metabolomics analysis used the same LC-MS parameters as untargeted, but  
579 data analysis was performed using Agilent MassHunter Quantitative Analysis software.  
580 Metabolite identification was performed by matching accurate mass and retention time with  
581 authentic standards analyzed by the same method. Data were normalized to the median and log  
582 transformed. Statistical analysis for targeted metabolomics data was done using Metaboanalyst.

583

#### 584 Stress resistance assay

585 Paraquat (Methyl viologen dichloride hydrate from Sigma-Aldrich) was used to induce  
586 oxidative stress. Worms were synchronized from eggs on RNAi plates seeded with *E.*  
587 *coli* HT115 strain expressing dsRNAi for a particular gene and at L4 stage 40 worms were  
588 transferred on RNAi-FUDR plates containing 5 mM paraquat. A minimum of two plates per  
589 strain per condition were used per replicate experiment. Worms were then scored every day  
590 and considered dead when they did not move in response to prodding under a dissection  
591 microscope. Worms that crawled off the plate were not considered, but ruptured worms were  
592 noted and considered as previously described<sup>4</sup>.

593

594 Lifespans

595 Gravid adults were placed on NGM plates containing 1mM  $\beta$ -D-isothiogalactopyranoside  
596 (IPTG), 25  $\mu$ g/ml carbenicillin, and the corresponding RNAi clone from the Vidal or Ahringer  
597 RNAi library. After 3 hours, the adults were removed, and the eggs were allowed to develop at  
598 20°C until they reached late L4/young adult stage. From here, 40 to 90 worms were placed on  
599 each RNAi plate and transferred to fresh RNAi + FUDR plates on day 1, day 2, day 4, and day 6  
600 of adulthood. A minimum of two plates per strain per condition were used per replicate  
601 experiment. Experimental animals were scored every 2-3 days and considered dead when they  
602 did not move in response to prodding under a dissection microscope. Worms that crawled off  
603 the plate were not considered, but ruptured worms were considered as previously described<sup>4</sup>.

604

605 Computational Modeling

606 The computer model was generated by building a stoichiometric matrix  $S$  (10 reactants  
607 by 13 reactions), accounting for all reactions shown in Fig 4A. A steady-state approximation was  
608 used, as shown in Eq 1. In Eq. 1,  $S$  is the stoichiometric matrix and  $\mathbf{J}$  is a vector of fluxes for  
609 each of the reactions.

610

611 **Eq. 1**

612

$$S \cdot \mathbf{J} = \mathbf{0}$$

613

614 To obtain a biologically relevant solution, we projected the expression data of genes  
615 involved in the reactions used in the model to the nullspace of  $S$  by solving for Eq. 2. Single  
616 genes were used as representative genes for each reaction to simplify the model. Gene  
617 expressions related to input fluxes were assumed to be one for all strains. Reactions used in the  
618 model and the relevant gene expression data are shown in **Supplementary Data 7**. In Eq. 2,  $M$   
619 is the nullspace of  $S$ ,  $\mathbf{b}$  is the vector of relative gene expression data from the wild type, FMO-2



620 OE or FMO-2 KO that have been normalized to the wild type, and  $\mathbf{x}$  is a vector such that  $S\mathbf{x}$  is  
621 the projection of  $\mathbf{b}$  onto the column space of  $M$ , which gives us the vector of reaction fluxes,  $\mathbf{J}$ ,  
622 within the nullspace of  $S$ . To account for data variability, expression level with greater than 0.5x  
623 or less than 1.5x fold changes were assumed to be equal to the wild type control. Eq. 2 was  
624 solved using the lsqminnorm function in MATLAB 2018a. The lsqminnorm function returns the  
625 minimum norm least-squares solution to  $M\mathbf{x} = \mathbf{b}$  by minimizing both the norm of  $M \cdot \mathbf{x} - \mathbf{b}$  and  
626 the norm of  $\mathbf{x}$ .

627

628 **Eq. 2**

$$629 \quad M \cdot \mathbf{x} = \mathbf{b}$$

630

631 The inner product of the resulting vector  $\mathbf{x}$  and the nullspace matrix  $M$  was obtained to  
632 calculate the reaction flux predictions resulting from the gene expression projection as shown in  
633 Eq. 3. The calculated  $\mathbf{J}$  for FMO-2 OE and FMO-2 KO were normalized to that of the wild type  
634 to obtain the relative fluxes.

635

636 **Eq. 3**

$$637 \quad M \cdot \mathbf{x} = \mathbf{J}$$

638

639 Quantitative PCR

640 RNA was isolated from day 1 adult worms following three rounds of freeze-thaw in liquid  
641 nitrogen using Invitrogen's Trizol extraction method and 1  $\mu\text{g}$  of RNA was reverse transcribed to  
642 cDNA using SuperScript™ II Reverse Transcriptase (Invitrogen). Gene expression levels were  
643 measured using 1  $\mu\text{g}$  of cDNA and SYBR™ Green PCR Mastermix (Applied Biosystems) and  
644 primers at 10  $\mu\text{M}$  concentration. mRNA levels were normalized using previously published

645 housekeeping gene controls, *tba-1* and *pmp-3*<sup>60</sup>. List of primers used are in **Supplementary**  
646 **Data 11**.

647

#### 648 Enzyme Kinetic Assays

649 Oxygenation activity of FMO-2 and mFMO5 was characterized using the method  
650 previously described<sup>61</sup>. Briefly, oxygenation of substrates was determined by  
651 spectrophotometrically following the consumption of NADPH at 340 nm using the molar  
652 extinction coefficient 6.22 mM<sup>-1</sup>cm<sup>-1</sup>. Components of the assay buffer included 25 mM sodium  
653 phosphate buffer (pH 8.5), 0.5 mM diethylenetriaminepentaacetic acid (DETAPAC), 0.5 mM  
654 NADPH, and 0.04 μM FMO-2 (0.4 μM FMO5) with excess FAD. The final substrate  
655 concentrations for tryptophan were 100, 250, 500, 750 μM and 1, 2.5, 5, 7.5, and 10 mM. The  
656 final substrate concentrations for MMI were 100, 300, and 600 μM and 1, 3, 5, 7, 10, and 30  
657 mM. To determine the rate of oxidation of NADPH by FMO, NADPH concentrations of 10, 30,  
658 100, 300, 500, and 700 μM and 1 and 1.5 mM were used. Experiments were conducted at 30°C  
659 while shaking. Kinetic parameters (i.e  $k_{cat}$  and  $K_m$ ) were determined by fitting plots of the rate of  
660 turnover vs the substrate concentration to the Michaelis-Menton equation using GraphPad  
661 Prism (version 9.1.0; GraphPad Software Inc., San Diego, CA.). Purified FMO-2 protein was  
662 purchased from GenScript. Purified FMO5 protein, NADPH, FAD, MMI, L-tryptophan, and all  
663 other substrates were purchased from Sigma Aldrich (St. Louis, MO). DETAPAC and sodium  
664 phosphate buffer were purchased from Fisher (Waltham, MA).

665

#### 666 In vitro studies LC-MS

667 Analysis of samples from *in vitro* studies with purified FMO2 and FMO5 protein was performed  
668 using LC-MS with untargeted feature detection. Samples contained 100, 250, or 500 μM  
669 tryptophan in the same conditions as the enzymatic assays with either FMO-2 or FMO5  
670 proteins. 100 μL of conditioned media were vortexed with 400 μL of 1:1:1

671 methanol:acetonitrile:acetone to precipitate protein. The extract was centrifuged for 10 minutes  
672 at 16,000 x g and 200  $\mu$ L of supernatant were transferred to a clean autosampler vial with insert  
673 and dried under a stream of nitrogen gas. The dried extract was reconstituted in 50  $\mu$ L of 85/15  
674 acetonitrile/water and analyzed by HILIC-TOF-MS on an Agilent 1290 Infinity II / Agilent 6545  
675 QTOF. Chromatography was performed on a Waters BEH Amide column (2.1 mm ID x 10 cm,  
676 1.7  $\mu$ m particle diameter) with mobile phase prepared as described previously<sup>62</sup> except that  
677 mobile phase A contained 5% acetonitrile. The flow rate was 0.3mL/min, the column  
678 temperature 55 °C , and the gradient was as follows: 0-0.70 min 100%B, 0.7-6.7 min 100-85%B,  
679 6.7-8.7 min 85%B, 8.7-16 min 85-28%B, 16-16.7 min 28%B, 16.7-16.8 28-0%B. Total run time  
680 was 22 min. Ion polarity was positive, gas temp was 320 °C , drying gas was 8L/min, nebulizer  
681 was 35 psi, sheath gas temp and flow were 350 °C and 11 L/min, capillary voltage 3500V. The  
682 instrument was operated in full scan mode at 2 spectra/sec and a mass range of 50-1200 Da.  
683 Feature detection and alignment was performed using XCMS. Potential reaction products were  
684 detected by computationally examining the data for features present in each sample set.  
685 Identification of potential reaction products was performed using MS/MS data acquired from a  
686 pooled sample.

687

#### 688 Statistical analyses

689 Log-rank test was used to derive p-value for lifespan and paraquat survival assays using  
690  $p < 0.0001$  cut-off threshold compared to EV controls. Paired-test was used to derive p-values  
691 for targeted metabolomics data using  $p < 0.05$  cut-off threshold compared to the wild type. One-  
692 way ANOVA followed by Tukey's *post hoc* test was used to derive p-values for SAM/SAH ratio  
693 using  $p < 0.05$  cut-off threshold. Paired t-test was used to derive p-values for comparing the  
694 metabolomics data of HepG2 pDEST control and FMO2, FMO4, and FMO5 OE cell lines using  
695  $p < 0.05$  cut-off threshold.

696 **References**

697

- 698 1. Rossner R, Kaeberlein M, Leiser SF. Flavin-containing monooxygenases in aging and  
699 disease: Emerging roles for ancient enzymes. *J Biol Chem*. 2017.  
700 doi:10.1074/jbc.R117.779678
- 701 2. Ziegler DM. An overview of the mechanism, substrate specificities, and structure of  
702 FMOs. In: *Drug Metabolism Reviews*. ; 2002. doi:10.1081/DMR-120005650
- 703 3. Krueger SK, Williams DE. Mammalian flavin-containing monooxygenases:  
704 Structure/function, genetic polymorphisms and role in drug metabolism. *Pharmacol Ther*.  
705 2005. doi:10.1016/j.pharmthera.2005.01.001
- 706 4. Leiser SF, Miller H, Rossner R, et al. Cell nonautonomous activation of flavin-containing  
707 monooxygenase promotes longevity and health span. *Science (80- )*. 2015.  
708 doi:10.1126/science.aac9257
- 709 5. Steinbaugh MJ, Sun LY, Bartke A, Miller RA. Activation of genes involved in xenobiotic  
710 metabolism is a shared signature of mouse models with extended lifespan. *Am J Physiol*  
711 *Metab*. 2012. doi:10.1152/ajpendo.00110.2012
- 712 6. Swindell WR. Genes and gene expression modules associated with caloric restriction and  
713 aging in the laboratory mouse. *BMC Genomics*. 2009. doi:10.1186/1471-2164-10-585
- 714 7. Bennett CF, Kwon JJ, Chen C, et al. Transaldolase inhibition impairs mitochondrial  
715 respiration and induces a starvation-like longevity response in *Caenorhabditis elegans*.  
716 *PLoS Genet*. 2017. doi:10.1371/journal.pgen.1006695
- 717 8. Veeravalli S, Omar BA, Houseman L, et al. The phenotype of a flavin-containing  
718 monooxygenase knockout mouse implicates the drug-metabolizing enzyme FMO1 as a  
719 novel regulator of energy balance. *Biochem Pharmacol*. 2014.  
720 doi:10.1016/j.bcp.2014.04.007
- 721 9. Scott F, Gonzalez Malagon SG, O'Brien BA, et al. Identification of flavin-containing

- 722 monoxygenase 5 (FMO5) as a regulator of glucose homeostasis and a potential sensor  
723 of gut bacteria. *Drug Metab Dispos.* 2017. doi:10.1124/dmd.117.076612
- 724 10. Huang S, Howington MB, Dobry CJ, Evans CR, Leiser SF. Flavin-Containing  
725 Monoxygenases Are Conserved Regulators of Stress Resistance and Metabolism. *Front*  
726 *Cell Dev Biol.* 2021;9. doi:10.3389/fcell.2021.630188
- 727 11. Gao AW, Smith RL, van Weeghel M, Kamble R, Janssens GE, Houtkooper RH.  
728 Identification of key pathways and metabolic fingerprints of longevity in *C. elegans*. *Exp*  
729 *Gerontol.* 2018;113:128-140. doi:10.1016/J.EXGER.2018.10.003
- 730 12. Menendez JA, Joven J. One-carbon metabolism: An aging-cancer crossroad for the  
731 gerosuppressant metformin. *Aging (Albany NY).* 2012.
- 732 13. Cabreiro F, Au C, Leung KY, et al. Metformin retards aging in *C. elegans* by altering  
733 microbial folate and methionine metabolism. *Cell.* 2013. doi:10.1016/j.cell.2013.02.035
- 734 14. Annibal A, George Tharyan R, Fides Schonewolff M, et al. Regulation of the one carbon  
735 folate cycle as a shared metabolic signature of longevity. doi:10.1038/s41467-021-23856-  
736 9
- 737 15. Locasale JW. Serine, glycine and one-carbon units: Cancer metabolism in full circle. *Nat*  
738 *Rev Cancer.* 2013. doi:10.1038/nrc3557
- 739 16. Kabil H, Kabil O, Banerjee R, Harshman LG, Pletcher SD. Increased transsulfuration  
740 mediates longevity and dietary restriction in *Drosophila*. *Proc Natl Acad Sci.* 2011.  
741 doi:10.1073/pnas.1102008108
- 742 17. Hansen M, Hsu A-L, Dillin A, Kenyon C. New Genes Tied to Endocrine, Metabolic, and  
743 Dietary Regulation of Lifespan from a *Caenorhabditis elegans* Genomic RNAi Screen.  
744 Kim S, ed. *PLoS Genet.* 2005;1(1):e17. doi:10.1371/journal.pgen.0010017
- 745 18. Oxenkrug GF. The extended life span of *Drosophila melanogaster* eye-color (white and  
746 vermilion) mutants with impaired formation of kynurenine. *J Neural Transm.* 2010.  
747 doi:10.1007/s00702-009-0341-7

- 748 19. Van Der Goot AT, Zhu W, Vázquez-Manrique RP, et al. Delaying aging and the aging-  
749 associated decline in protein homeostasis by inhibition of tryptophan degradation. *Proc*  
750 *Natl Acad Sci U S A*. 2012. doi:10.1073/pnas.1203083109
- 751 20. Sutphin GL, Backer G, Sheehan S, et al. Caenorhabditis elegans orthologs of human  
752 genes differentially expressed with age are enriched for determinants of longevity. *Aging*  
753 *Cell*. 2017. doi:10.1111/accel.12595
- 754 21. Badawy AAB. Kynurenine pathway of tryptophan metabolism: Regulatory and functional  
755 aspects. *Int J Tryptophan Res*. 2017;10(1). doi:10.1177/1178646917691938
- 756 22. Liu YJ, Janssens GE, McIntyre RL, et al. Glycine promotes longevity in caenorhabditis  
757 elegans in a methionine cycle-dependent fashion. *PLoS Genet*. 2019.  
758 doi:10.1371/journal.pgen.1007633
- 759 23. Depuydt G, Xie F, Petyuk VA, et al. LC-MS proteomics analysis of the insulin/IGF-1-  
760 deficient caenorhabditis elegans daf-2(e1370) mutant reveals extensive restructuring of  
761 intermediary metabolism. *J Proteome Res*. 2014. doi:10.1021/pr401081b
- 762 24. Johnson TE, Cypser J, De Castro E, et al. Gerontogenes mediate health and longevity in  
763 nematodes through increasing resistance to environmental toxins and stressors. In:  
764 *Experimental Gerontology*. ; 2000. doi:10.1016/S0531-5565(00)00138-8
- 765 25. Finkel T, Holbrook NJ. Oxidants, oxidative stress and the biology of ageing. *Nature*. 2000.  
766 doi:10.1038/35041687
- 767 26. Johnson TE, Henderson S, Murakami S, et al. Longevity genes in the nematode  
768 Caenorhabditis elegans also mediate increased resistance to stress and prevent disease.  
769 *J Inherit Metab Dis*. 2002. doi:10.1023/A:1015677828407
- 770 27. Miller RA. Cell stress and aging: New emphasis on multiplex resistance mechanisms. In:  
771 *Journals of Gerontology - Series A Biological Sciences and Medical Sciences*. ; 2009.  
772 doi:10.1093/gerona/gln072
- 773 28. Kruempel JCP, Miller HA, Schaller ML, et al. Hypoxic response regulators RHY-1 and

- 774 EGL-9/PHD promote longevity through a VHL-1-independent transcriptional response.  
775 *GeroScience*. 2020;42(6):1621-1633. doi:10.1007/s11357-020-00194-0
- 776 29. Lee HJ, Noormohammadi A, Koyuncu S, et al. Prostaglandin signals from adult germline  
777 stem cells delay somatic ageing of *Caenorhabditis elegans*. *Nat Metab*. 2019;1(8):790-  
778 810. doi:10.1038/s42255-019-0097-9
- 779 30. Hine C, Harputlugil E, Zhang Y, et al. Endogenous hydrogen sulfide production is  
780 essential for dietary restriction benefits. *Cell*. 2015;160(1-2):132-144.  
781 doi:10.1016/j.cell.2014.11.048
- 782 31. Wei Y, Kenyon C. Roles for ROS and hydrogen sulfide in the longevity response to  
783 germline loss in *Caenorhabditis elegans*. *Proc Natl Acad Sci U S A*. 2016;113(20):E2832-  
784 E2841. doi:10.1073/pnas.1524727113
- 785 32. Ding W, Smulan LJ, Hou NS, Taubert S, Watts JL, Walker AK. s-Adenosylmethionine  
786 Levels Govern Innate Immunity through Distinct Methylation-Dependent Pathways. *Cell*  
787 *Metab*. 2015;22:633-645. doi:10.1016/j.cmet.2015.07.013
- 788 33. Obata F, Miura M. Enhancing S-adenosyl-methionine catabolism extends *Drosophila*  
789 lifespan. *Nat Commun*. 2015;6(1):1-9. doi:10.1038/ncomms9332
- 790 34. Orth JD, Thiele I, Palsson BO. What is flux balance analysis? *Nat Biotechnol*. 2010.  
791 doi:10.1038/nbt.1614
- 792 35. Singh S, Samal A, Giri V, Krishna S, Raghuram N, Jain S. Flux-based classification of  
793 reactions reveals a functional bow-tie organization of complex metabolic networks. *Phys*  
794 *Rev E - Stat Nonlinear, Soft Matter Phys*. 2013. doi:10.1103/PhysRevE.87.052708
- 795 36. Walker AK, Jacobs RL, Watts JL, et al. A conserved SREBP-1/phosphatidylcholine  
796 feedback circuit regulates lipogenesis in metazoans. *Cell*. 2011.  
797 doi:10.1016/j.cell.2011.09.045
- 798 37. Choi H, Cho SC, Ha YW, et al. DDS promotes longevity through a microbiome-mediated  
799 starvation signal. *Transl Med Aging*. 2019;3:64-69. doi:10.1016/j.tma.2019.07.001

- 800 38. Yi P, Melnyk S, Pogribna M, Pogribny IP, Hine RJ, James SJ. Increase in plasma  
801 homocysteine associated with parallel increases in plasma S-adenosylhomocysteine and  
802 lymphocyte DNA hypomethylation. *J Biol Chem.* 2000;275(38):29318-29323.  
803 doi:10.1074/jbc.M002725200
- 804 39. Nicoll CR, Bailleul G, Fiorentini F, Mascotti ML, Fraaije MW, Mattevi A. Ancestral-  
805 sequence reconstruction unveils the structural basis of function in mammalian FMOs. *Nat*  
806 *Struct Mol Biol.* 2020;27(1):14-24. doi:10.1038/s41594-019-0347-2
- 807 40. Sievers F, Wilm A, Dineen D, et al. Fast, scalable generation of high-quality protein  
808 multiple sequence alignments using Clustal Omega. *Mol Syst Biol.* 2011;7.  
809 doi:10.1038/msb.2011.75
- 810 41. Robert X, Gouet P. Deciphering key features in protein structures with the new ENDscript  
811 server. *Nucleic Acids Res.* 2014;42(W1). doi:10.1093/nar/gku316
- 812 42. Brosnan ME, Brosnan JT. Formate: The Neglected Member of One-Carbon Metabolism.  
813 2016. doi:10.1146/annurev-nutr-071715-050738
- 814 43. Sun L, Sadighi Akha AA, Miller RA, Harper JM. Life-span extension in mice by  
815 preweaning food restriction and by methionine restriction in middle age. *Journals*  
816 *Gerontol - Ser A Biol Sci Med Sci.* 2009. doi:10.1093/gerona/glp051
- 817 44. Lee BC, Kaya A, Ma S, et al. Methionine restriction extends lifespan of *Drosophila*  
818 *melanogaster* under conditions of low amino-acid status. *Nat Commun.* 2014.  
819 doi:10.1038/ncomms4592
- 820 45. Parkhitko AA, Binari R, Zhang N, Asara JM, Demontis F, Perrimon N. Tissue-specific  
821 down-regulation of S-adenosyl-homocysteine via suppression of dAhcyL1/dAhcyL2  
822 extends health span and life span in *Drosophila*. *Genes Dev.* 2016.  
823 doi:10.1101/gad.282277.116
- 824 46. Dues DJ, Andrews EK, Senchuk MM, Van Raamsdonk JM. Resistance to Stress Can Be  
825 Experimentally Dissociated From Longevity. *Journals Gerontol Ser A.* 2019;74(8):1206-



- 826 1214. doi:10.1093/gerona/gly213
- 827 47. Reddy RR, Ralph EC, Motika MS, Zhang J, Cashman JR. Characterization of human  
828 flavin-containing monooxygenase (FMO) 3 and FMO5 expressed as maltose-binding  
829 protein fusions. *Drug Metab Dispos.* 2010. doi:10.1124/dmd.110.033639
- 830 48. Lončar N, Fiorentini F, Bailleul G, et al. Characterization of a thermostable flavin-  
831 containing monooxygenase from *Nitrospira lacisaponensis* (NiFMO). *Appl Microbiol*  
832 *Biotechnol.* 2019;103(4):1755-1764. doi:10.1007/s00253-018-09579-w
- 833 49. Chen Y, Patel NA, Crombie A, Scrivens JH, Murrell JC. Bacterial flavin-containing  
834 monooxygenase is trimethylamine monooxygenase. *Proc Natl Acad Sci.* 2011.  
835 doi:10.1073/pnas.1112928108
- 836 50. Fiorentini F, Geier M, Binda C, et al. Biocatalytic Characterization of Human FMO5:  
837 Unearthing Baeyer-Villiger Reactions in Humans. *ACS Chem Biol.* 2016;11(4):1039-  
838 1048. doi:10.1021/acscchembio.5b01016
- 839 51. Kapahi P, Kaeberlein M, Hansen M. Dietary restriction and lifespan: Lessons from  
840 invertebrate models. *Ageing Res Rev.* 2017;39:3-14. doi:10.1016/j.arr.2016.12.005
- 841 52. Gu X, Orozco JM, Saxton RA, et al. SAMTOR is an S-adenosylmethionine sensor for the  
842 mTORC1 pathway. *Science (80- ).* 2017;358(6364):813-818.  
843 doi:10.1126/science.aao3265
- 844 53. Metz R, Rust S, DuHadaway JB, et al. IDO inhibits a tryptophan sufficiency signal that  
845 stimulates mTOR: A novel IDO effector pathway targeted by D-1-methyl-tryptophan.  
846 *Oncoimmunology.* 2012;1(9):1460-1468. doi:10.4161/onci.21716
- 847 54. Wang H, Ji Y, Wu G, et al. L-Tryptophan activates mammalian target of rapamycin and  
848 enhances expression of tight junction proteins in intestinal porcine epithelial cells. *J Nutr.*  
849 2015;145(6):1156-1162. doi:10.3945/jn.114.209817
- 850 55. Newman AC, Maddocks ODK. One-carbon metabolism in cancer. *Br J Cancer.*  
851 2017;116(12):1499-1504. doi:10.1038/bjc.2017.118

- 852 56. Beydoun S, Choi HS, Dela-Cruz G, et al. An alternative food source for metabolism and  
853 longevity studies in *Caenorhabditis elegans*. *Commun Biol*. 2021;4(1).  
854 doi:10.1038/s42003-021-01764-4
- 855 57. Overmyer KA, Thonusin C, Qi NR, Burant CF, Evans CR. Impact of anesthesia and  
856 euthanasia on metabolomics of mammalian tissues: Studies in a C57BL/6J mouse  
857 model. *PLoS One*. 2015. doi:10.1371/journal.pone.0117232
- 858 58. Overmyer KA, Thonusin C, Qi NR, et al. Maximal oxidative capacity during exercise is  
859 associated with skeletal muscle fuel selection and dynamic changes in mitochondrial  
860 protein acetylation. *PLoS One*. 2015. doi:10.1016/j.cmet.2015.02.007
- 861 59. Smith CA, Want EJ, O'Maille G, Abagyan R, Siuzdak G. XCMS: Processing mass  
862 spectrometry data for metabolite profiling using nonlinear peak alignment, matching, and  
863 identification. *Anal Chem*. 2006. doi:10.1021/ac051437y
- 864 60. Zhang Y, Chen D, Smith MA, Zhang B, Pan X. Selection of reliable reference genes in  
865 *caenorhabditis elegans* for analysis of nanotoxicity. *PLoS One*. 2012;7(3):31849.  
866 doi:10.1371/journal.pone.0031849
- 867 61. Motika MS, Zhang J, Zheng X, Riedler K, Cashman JR. Novel variants of the human  
868 flavin-containing monooxygenase 3 (FMO3) gene associated with trimethylaminuria. *Mol*  
869 *Genet Metab*. 2009;97(2):128-135. doi:10.1016/j.ymgme.2009.02.006
- 870 62. Blaženović I, Kind T, Sa MR, et al. Structure Annotation of All Mass Spectra in  
871 Untargeted Metabolomics. *Anal Chem*. 2019;91(3):2155-2162.  
872 doi:10.1021/acs.analchem.8b04698  
873
